# Supplementary material for: Periodic acid-promoted methylenation of imidazoheteroarenes: a green approach using ethylene glycol as a C1 source
Source: Royal Society of Chemistry journal article supplement (doi:10.1039/d5ra09947a), 2026-03-02
Supplement: d5ra09947a1.pdf [file d5ra09947a1.pdf]

## Supporting Information

### Periodic acid-Promoted Methylenation of Imidazoheteroarenes: A Green Approach Using Ethylene Glycol as C1 Source

Marcelo S. Franco,<sup>a</sup> Matheus Y. G. Watanabe,<sup>a</sup> Jhefferson S. Guilhermi,<sup>b</sup>  
Brunno S. Souza,<sup>b</sup> Sumbal Saba,<sup>b\*</sup> Jamal Rafique,<sup>b,c\*</sup> Antonio L. Braga<sup>a\*</sup>

<sup>a</sup> Departamento de Química, Universidade Federal de Santa Catarina- UFSC, Florianópolis 88040-900, SC-Brazil.

<sup>b</sup> Laboratory of Sustainable Synthesis and Organochalcogen (LabSO), Instituto de Química, Universidade Federal de Goiás - UFG, Goiânia, 74690-900, GO-Brazil.

<sup>c</sup> Instituto de Química, Universidade Federal do Mato Grosso do Sul - UFMS, Campo Grande, 79074-460, MS-Brazil.

\* Corresponding author: [sumbal.saba@ufg.br](mailto:sumbal.saba@ufg.br) (S.S.); [braga.antonio@ufsc.br](mailto:braga.antonio@ufsc.br) (A.L.B.);  
[jamal.rafique@ufms.br](mailto:jamal.rafique@ufms.br) (J.R.)

### Table of Contents

|             |                                                                       |     |
|-------------|-----------------------------------------------------------------------|-----|
| <b>I.</b>   | EXPERIMENTAL PROCEDURES .....                                         | S2  |
| I.I         | Thin layer chromatography .....                                       | S2  |
| I.II        | Column chromatography .....                                           | S2  |
| I.III       | Melting points .....                                                  | S2  |
| I.IV        | Nuclear magnetic resonance spectroscopy .....                         | S2  |
| I.V         | High Resolution Mass Spectrometry .....                               | S2  |
| <b>II.</b>  | SUBSTRATES .....                                                      | S2  |
| <b>III.</b> | GENERAL PROCEDURE FOR THE PREPARATION OF COMPOUND <b>3/4</b> : ..     | S3  |
| <b>IV.</b>  | CHARACTERIZATION DATA .....                                           | S3  |
| <b>V.</b>   | REFERENCES .....                                                      | S9  |
| <b>VI.</b>  | <sup>1</sup> H NMR AND <sup>13</sup> C NMR SPECTRA OF COMPOUNDS ..... | S10 |

## I. EXPERIMENTAL PROCEDURES

Unless otherwise stated, all reagents and solvents were obtained from commercial sources and used without any further purification.

### I.I Thin layer chromatography

Reaction monitoring and retention factor (*R<sub>f</sub>*) determination were performed on pre-coated thin layer chromatography (TLC) sheets (ALUGRAM<sup>®</sup> Xtra SIL G/UV<sub>254</sub>, MACHEREY-NAGEL, 0.20 mm thickness of layer) which were visualized either by quenching of ultraviolet or fluorescence light ( $\lambda_{\text{max}}$  = 254 and 366 nm, respectively) or by staining with iodine vapor and sprayed with vanillin–sulfuric acid solution, followed by heating the plate with a heat gun.<sup>[1]</sup>

### I.II Column chromatography

Column chromatography was performed on silica gel (Silica gel 60, MACHEREY-NAGEL, 130 – 270 mesh particle size).

### I.III Melting points

The melting points (MP) of the synthesized compounds were determined on a digital melting point instrument model MQAPF-301 (Microchemistry), using a heating rate of 2–3 °C min<sup>-1</sup>. Data is expressed in degrees Celsius (°C).

### I.IV Nuclear magnetic resonance spectroscopy

All proton nuclear magnetic resonance spectra (<sup>1</sup>H NMR) and carbon-13 nuclear magnetic resonance spectra (<sup>13</sup>C NMR) were obtained at 400 MHz or 100 MHz on a Bruker AVANCE DRX spectrometer. Spectra were recorded in CDCl<sub>3</sub>. Chemical shifts ( $\delta$ ) were reported in part per million (ppm) in relation to tetramethylsilane (TMS, used as an internal standard for <sup>1</sup>H NMR spectra), and CDCl<sub>3</sub> (used as an internal standard for <sup>13</sup>C NMR spectra). For <sup>1</sup>H NMR spectra data are reported as follows: chemical shift ( $\delta$ ), multiplicity and coupling constant (*J*). Multiplicity of peaks are described as singlets (*s*), doublets (*d*), doublet of doublets (*dd*), doublet of doublets of doublets (*ddd*), triplets (*t*), doublet of triplets (*dt*), and multiplets (*m*).

### I.V High Resolution Mass Spectrometry

HRMS analyzes were performed on a microTOF-QII mass spectrometer (Bruker), located at the Center for Structural Molecular Biology (CEBIME – UFSC). The spectrometer was operated in positive (+) and negative (-) ion modes, using Atmospheric Pressure Photoionization (APPI) or Electrospray Ionization (ESI) as the ionization mode. Data were processed in Bruker Data Analysis software version 4.0 and reported as *m/z*.

## II. SUBSTRATES

The starting materials, imidazo[1,2-*a*]pyridines<sup>[2-8]</sup> and imidazo[2,1-*b*]thiazoles<sup>[9-10]</sup> were prepared according to the literature reports.

### III. GENERAL PROCEDURE FOR THE PREPARATION OF COMPOUND 3/4:

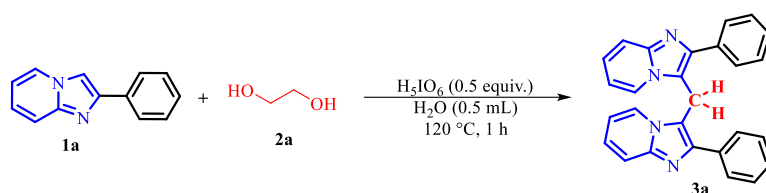

2-Phenylimidazo[1,2-*a*]pyridine **1a** or its derivatives (0.3 mmol), ethylene glycol (**2a**) (0.15 mmol), and water (0.5 mL) were added to a 20 mL Schlenk tube equipped with a magnetic stir bar. Periodic acid (0.15 mmol) was then added, and the tube was sealed. The reaction mixture was stirred for 1 hour at 120 °C in an oil bath. After the reaction time had elapsed, the system was allowed to cool to room temperature. The reaction mixture was transferred to a separation funnel, and saturated sodium bicarbonate (NaHCO<sub>3</sub>) solution (10 mL) was added. The mixture was subsequently extracted with ethyl acetate (10 mL × 3). The organic phase was dried with anhydrous magnesium sulfate (MgSO<sub>4</sub>), filtered, and concentrated under vacuum using a rotary evaporator. The crude product was purified by silica gel column chromatography with a suitable ethyl acetate/hexane mixture to provide the desired product.

### IV. CHARACTERIZATION DATA

#### Bis(2-phenylimidazo[1,2-*a*]pyridin-3-yl)methane (**3a**)

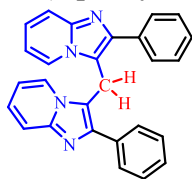

White solid, 57.1 mg, 95%; TLC (*R<sub>f</sub>*): 0.23 (Ethyl Acetate, 100%); MP: 215-219 °C (216-218 °C)<sup>14</sup>; <sup>1</sup>H NMR (400 MHz, CDCl<sub>3</sub>) δ (ppm): 7.80 – 7.76 (*m*, 4H), 7.54 – 7.48 (*m*, 6H), 7.45 – 7.40 (*m*, 2H), 7.33 (*dt*, *J* = 6.9, *J* = 1.1 Hz, 2H), 7.04 (*ddd*, *J* = 9.1, *J* = 6.8, *J* = 1.2 Hz, 2H), 6.46 (*td*, *J* = 6.8, *J* = 1.2 Hz, 2H), 4.98 (*s*, 2H); <sup>13</sup>C NMR (100 MHz, CDCl<sub>3</sub>) δ (ppm): 145.0, 144.2, 134.4, 129.0, 128.9, 128.3, 124.4, 123.8, 117.5, 114.4, 112.3, 19.8.

#### Bis(6-methyl-2-phenylimidazo[1,2-*a*]pyridin-3-yl)methane (**3b**)

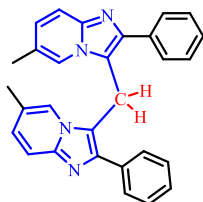

White solid, 62.6 mg, 94%; TLC (*R<sub>f</sub>*): 0.36 (Hexane/Ethyl Acetate, 50:50); MP: 272-277 °C (273-275 °C)<sup>14</sup>; <sup>1</sup>H NMR (400 MHz, CDCl<sub>3</sub>) δ (ppm): 7.84 (*d*, *J* = 7.9 Hz, 4H), 7.59 – 7.54 (*m*, 4H), 7.48 – 7.43 (*m*, 2H), 7.37 (*d*, *J* = 9.1 Hz, 2H), 7.02 (*s*, 2H), 6.83 (*dt*, *J* = 9.1, *J* = 1.6 Hz, 2H), 4.92 (*s*, 2H), 1.87 (*s*, 6H); <sup>13</sup>C NMR (100 MHz, CDCl<sub>3</sub>) δ (ppm): 143.9, 143.5, 134.9, 129.0, 128.1, 127.4, 122.0, 121.6, 116.4, 114.4, 19.0, 17.9.

### Bis(8-methyl-2-phenylimidazo[1,2-*a*]pyridin-3-yl)methane (3c)

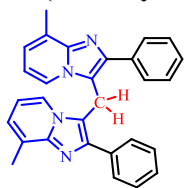

White solid, 107 mg, 76%; TLC (*R<sub>f</sub>*): 0.26 (Hexane/Ethyl Acetate, 50:50); MP: 184-190 °C (178-179°C)<sup>11</sup>; <sup>1</sup>H NMR (400 MHz, CDCl<sub>3</sub>) δ 7.76 – 7.73 (*m*, 4H), 7.49 – 7.42 (*m*, 4H), 7.39 – 7.34 (*m*, 2H), 7.20 (*d*, *J* = 6.8 Hz, 2H), 6.78 – 6.73 (*m*, 2H), 6.36 – 6.30 (*m*, 2H), 4.83 (*s*, 2H), 2.52 (*s*, 6H); <sup>13</sup>C NMR (100 MHz, CDCl<sub>3</sub>) δ 145.1, 143.4, 134.4, 128.9, 128.5, 127.8, 127.1, 122.9, 121.4, 114.7, 112.1, 19.8, 16.9.

### Bis(7-methyl-2-phenylimidazo[1,2-*a*]pyridin-3-yl)methane (3d)

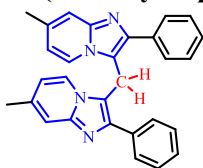

White solid, 60.6 mg, 97%; TLC (*R<sub>f</sub>*): 0.32 (Hexane/Ethyl Acetate, 50:50); MP: 216-218 °C (215-217 °C)<sup>14</sup>; <sup>1</sup>H NMR (400 MHz, CDCl<sub>3</sub>) δ (ppm): 7.83 – 7.74 (*m*, 4H), 7.55 – 7.49 (*m*, 4H), 7.46 – 7.40 (*m*, 2H), 7.25 (*s*, 2H), 7.18 (*d*, *J* = 7.0 Hz, 2H), 6.27 (*dd*, *J* = 7.1, *J* = 1.6 Hz, 2H), 4.93 (*s*, 2H), 2.25 (*s*, 6H); <sup>13</sup>C NMR (100 MHz, CDCl<sub>3</sub>) δ (ppm): 145.5, 143.7, 135.4, 134.6, 129.0, 128.9, 128.2, 123.1, 115.8, 115.0, 114.0, 21.2, 19.8.

### Bis(2-(3,4-dimethoxyphenyl)imidazo[1,2-*a*]pyridin-3-yl)methane (3e)

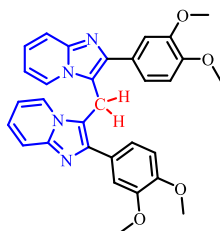

White solid, 65.6 mg, 84%; TLC (*R<sub>f</sub>*): 0.05 (Hexane/Ethyl acetate, 50:50); MP: 150-155 °C (192-193 °C)<sup>12</sup>; <sup>1</sup>H NMR (200 MHz, CDCl<sub>3</sub>) δ (ppm): 7.55 (*d*, *J* = 9.0 Hz, 2H), 7.43 – 7.36 (*m*, 4H), 7.28 (*dd*, *J* = 8.1, *J* = 1.7 Hz, 2H), 7.12 – 7.02 (*m*, 2H), 6.99 (*d*, *J* = 8.3 Hz, 2H), 6.49 (*t*, *J* = 6.7 Hz, 2H), 4.98 (*s*, 2H), 3.98 (*s*, 6H), 3.96 (*s*, 6H); <sup>13</sup>C NMR (50 MHz, CDCl<sub>3</sub>) δ (ppm): 149.5, 149.3, 144.8, 143.9, 127.0, 124.5, 123.9, 121.3, 117.2, 114.1, 112.4, 112.2, 111.2, 56.2, 56.1, 19.8; HRMS (ESI<sup>+</sup>) *m/z*: [M+H]<sup>+</sup> calc. for C<sub>31</sub>H<sub>29</sub>N<sub>4</sub>O<sub>4</sub>, 521.2183; found: 521.2195.

### Bis(2-(3-methoxyphenyl)imidazo[1,2-*a*]pyridin-3-yl)methane (3f)

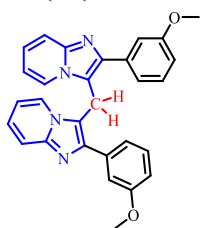

Beige solid, 60.1 mg, 87%; TLC (*R<sub>f</sub>*): 0.16 (Hexane/Ethyl Acetate, 50:50); MP: 120-134 °C; <sup>1</sup>H NMR (200 MHz, CDCl<sub>3</sub>) δ (ppm): 7.56 – 7.46 (*m*, 2H), 7.44 – 7.27 (*m*, 8H), 7.14 – 6.88 (*m*, 4H),

6.60 – 6.31 (*m*, 2H), 4.97 (*s*, 2H), 3.86 (*s*, 6H);  $^{13}\text{C}$  NMR (50 MHz,  $\text{CDCl}_3$ )  $\delta$  (ppm): 160.0, 144.9, 144.0, 135.7, 129.8, 124.4, 123.9, 121.4, 117.4, 114.5, 114.3, 114.2, 112.3, 55.4, 19.7; HRMS (ESI+)  $m/z$ :  $[\text{M}+\text{H}]^+$  calc. for  $\text{C}_{29}\text{H}_{25}\text{N}_4\text{O}_2$ , 461.1972; found: 461.1979.

### Bis(2-(4-fluorophenyl)imidazo[1,2-*a*]pyridin-3-yl)methane (3g)

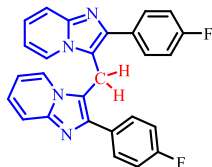

White solid, 60.4 mg, 92%; TLC (*R<sub>f</sub>*): 0.23 (Hexane/Ethyl Acetate, 50:50); MP: 189-192 °C (190-192 °C)<sup>14</sup>;  $^1\text{H}$  NMR (400 MHz,  $\text{CDCl}_3$ )  $\delta$ : 7.72 – 7.63 (*m*, 4H), 7.53 (*dt*,  $J = 9.1, 1.0$  Hz, 2H), 7.37 (*dt*,  $J = 6.9, 1.0$  Hz, 2H), 7.18 – 7.11 (*m*, 4H), 7.09 (*ddd*,  $J = 9.0, 6.8, 1.2$  Hz, 2H), 6.54 (*td*,  $J = 6.8, 1.2$  Hz, 2H), 4.87 (*s*, 2H);  $^{13}\text{C}$  NMR (100 MHz,  $\text{CDCl}_3$ )  $\delta$ : 162.7 (*d*,  $J_{\text{F-C}} = 248.1$  Hz), 144.9, 143.3, 130.5 (*d*,  $J_{\text{F-C}} = 8.2$  Hz), 130.3 (*d*,  $J_{\text{F-C}} = 3.3$  Hz), 124.5, 123.5, 117.5, 115.7 (*d*,  $J_{\text{F-C}} = 21.6$  Hz), 113.9, 112.5, 19.9.

### Bis(2-(4-chlorophenyl)imidazo[1,2-*a*]pyridin-3-yl)methane (3h)

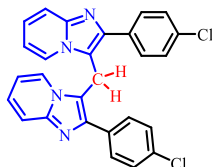

White solid, 57.8 mg, 82%; TLC (*R<sub>f</sub>*): 0.34 (Hexane/Ethyl Acetate, 50:50); MP: 250-255 °C (250-252 °C)<sup>11</sup>;  $^1\text{H}$  NMR (200 MHz,  $\text{CDCl}_3$ )  $\delta$  (ppm): 7.63 (*d*,  $^3J = 8.4$  Hz, 4H), 7.53 (*d*,  $^3J = 9.1$  Hz, 2H), 7.46 – 7.32 (*m*, 6H), 7.09 (*ddd*,  $J = 9.0, J = 6.8, J = 0.9$  Hz, 2H), 6.55 (*td*,  $J = 6.8, J = 1.1$  Hz, 2H), 4.88 (*s*, 2H);  $^{13}\text{C}$  NMR (50 MHz,  $\text{CDCl}_3$ )  $\delta$  (ppm): 145.1, 143.2, 134.3, 132.7, 130.0, 129.0, 124.7, 123.5, 117.7, 114.1, 112.7, 20.1.

### Bis(6-chloro-2-phenylimidazo[1,2-*a*]pyridin-3-yl)methane (3i)

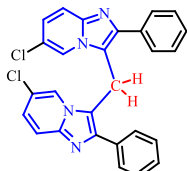

White solid, 37.3 mg, 53%; TLC (*R<sub>f</sub>*): 0.64 (Hexane/Ethyl Acetate, 50:50); MP: 225-230 °C (234-236 °C)<sup>11</sup>;  $^1\text{H}$  NMR (400 MHz,  $\text{CDCl}_3$ )  $\delta$  (ppm): 7.77 – 7.72 (*m*, 4H), 7.59 – 7.54 (*m*, 4H), 7.51 – 7.47 (*m*, 2H), 7.45 – 7.42 (*m*, 2H), 7.34 – 7.23 (*m*, 2H), 7.01 (*dd*,  $^3J = 9.5, ^4J = 1.9$  Hz, 2H), 4.90 (*s*, 2H);  $^{13}\text{C}$  NMR (100 MHz,  $\text{CDCl}_3$ )  $\delta$  (ppm): 145.4, 143.5, 133.7, 129.3, 129.1, 128.8, 126.0, 122.0, 120.7, 117.8, 114.8, 19.2.

### Bis(2-(4-bromophenyl)imidazo[1,2-*a*]pyridin-3-yl)methane (3j)

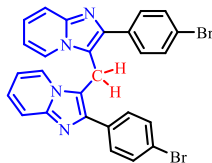

White solid, 63.6 mg, 76%; TLC (*R<sub>f</sub>*): 0.64 (Hexane/Ethyl Acetate, 50:50); MP: 255-260 °C (254-255 °C)<sup>11</sup>;  $^1\text{H}$  NMR (400 MHz,  $\text{CDCl}_3$ )  $\delta$  (ppm): 7.56 (*s*, 8H), 7.54 (*d*,  $J = 9.1$  Hz, 2H), 7.36 (*d*,  $J$

= 6.9 Hz, 2H), 7.10 (*ddd*,  $J = 8.8, J = 6.8, J = 0.9$  Hz, 2H), 6.56 (*td*,  $J = 6.8, J = 0.8$  Hz, 2H), 4.87 (*s*, 2H);  $^{13}\text{C}$  NMR (100 MHz,  $\text{CDCl}_3$ )  $\delta$  (ppm): 145.1, 143.2, 133.1, 131.9, 130.2, 124.7, 123.5, 122.6, 117.7, 114.1, 112.8, 20.1.

### Bis(2-(5-chlorothiophen-2-yl)imidazo[1,2-*a*]pyridin-3-yl)methane (3k)

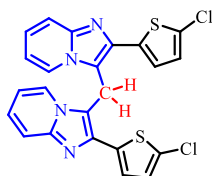

Pale brown solid, 53 mg, 73%; TLC (*R<sub>f</sub>*): 0.60 (Hexane/Ethyl Acetate, 50:50); MP: 247-250 °C (253-254 °C)<sup>13</sup>;  $^1\text{H}$  NMR (400 MHz,  $\text{CDCl}_3$ )  $\delta$  (ppm): 7.53 (*d*,  $J = 9.0$  Hz, 2H), 7.50 (*s*, 2H), 7.28 (*d*,  $J = 3.9$  Hz, 2H), 7.13 – 7.08 (*m*, 2H), 6.99 (*d*,  $J = 3.9$  Hz, 2H), 6.58 (*t*,  $J = 6.8$  Hz, 2H), 5.01 (*s*, 2H);  $^{13}\text{C}$  NMR (101 MHz,  $\text{CDCl}_3$ )  $\delta$  (ppm): 145.4, 137.8, 135.8, 131.3, 127.2, 125.3, 125.0, 123.7, 117.6, 113.4, 113.3, 20.4; HRMS (ESI+)  $m/z$ :  $[\text{M}+\text{H}]^+$  calc. for  $\text{C}_{23}\text{H}_{15}\text{Cl}_2\text{N}_4\text{S}_2$ , 481.0110; found: 481.0115.

### 4,4'-(Methylenebis(imidazo[1,2-*a*]pyridine-3,2-diyl))dibenzonitrile (3l)

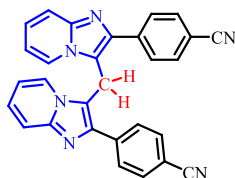

White solid, 57.8 mg, 86%; TLC (*R<sub>f</sub>*): 0.31 (Hexane/Ethyl Acetate, 50:50); MP: 294-296 °C (295-297 °C)<sup>14</sup>;  $^1\text{H}$  NMR (200 MHz,  $\text{CDCl}_3$ )  $\delta$  (ppm): 7.63 (*d*,  $J = 8.5$  Hz, 4H), 7.53 (*d*,  $J = 9.1$  Hz, 2H), 7.44 – 7.33 (*m*, 6H), 7.09 (*ddd*,  $J = 8.9, J = 6.8, J = 1.0$  Hz, 2H), 6.55 (*td*,  $J = 6.8, J = 0.9$  Hz, 2H), 4.87 (*s*, 2H);  $^{13}\text{C}$  NMR (50 MHz,  $\text{CDCl}_3$ )  $\delta$  (ppm): 145.1, 143.2, 134.3, 132.7, 130.0, 129.0, 124.7, 123.5, 117.7, 114.1, 112.7, 20.1.

### Bis(2-(4-(methylsulfonyl)phenyl)imidazo[1,2-*a*]pyridin-3-yl)methane (3m)

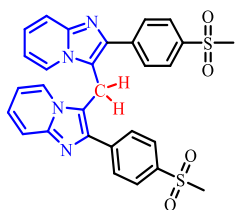

Pale red-brown solid, 56.3 mg, 67%; TLC (*R<sub>f</sub>*): 0.083 (Hexane/Ethyl Acetate, 50:50); MP: 273-275 °C (274-275 °C)<sup>11</sup>;  $^1\text{H}$  NMR (400 MHz,  $\text{CDCl}_3$ )  $\delta$  (ppm): 7.93 (*d*,  $J = 8.4$  Hz, 4H), 7.79 (*d*,  $J = 8.6$  Hz, 4H), 7.57 (*d*,  $J = 9.1$  Hz, 2H), 7.50 (*d*,  $J = 6.9$  Hz, 2H), 7.20 (*d*,  $J = 6.8$  Hz, 2H), 6.71 (*td*,  $J = 6.8, 1.2$  Hz, 2H), 4.93 (*s*, 2H), 3.09 (*s*, 6H);  $^{13}\text{C}$  NMR (101 MHz,  $\text{CDCl}_3$ )  $\delta$  (ppm): 145.0, 142.3, 139.6, 139.2, 129.0, 127.3, 125.1, 123.0, 117.8, 114.4, 113.1, 44.4, 29.5.

### Bis(2-(4-methoxyphenyl)-7-methylimidazo[1,2-a]pyridin-3-yl)methane (3n)

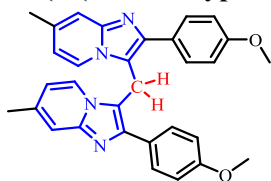

White solid, 63.3 mg, 87%; TLC (*R<sub>f</sub>*): 0.60 (Hexane/Ethyl Acetate, 50:50); MP: 203-205 °C; <sup>1</sup>H NMR (400 MHz, CDCl<sub>3</sub>) δ (ppm): 7.74 – 7.70 (*m*, 4H), 7.23 (*s*, 2H), 7.19 (*d*, *J* = 7.1 Hz, 2H), 7.06 – 7.02 (*m*, 4H), 6.26 (*dd*, *J* = 7.1, *J* = 1.5 Hz, 2H), 4.87 (*s*, 2H), 3.86 (*s*, 6H), 2.24 (*s*, 6H); <sup>13</sup>C NMR (100 MHz, CDCl<sub>3</sub>) δ (ppm): 159.5, 145.2, 143.4, 135.0, 130.0, 127.0, 123.0, 115.5, 114.6, 114.2, 113.4, 55.3, 21.1, 19.7; HRMS (ESI+) *m/z*: [M+H]<sup>+</sup> calc. for C<sub>31</sub>H<sub>29</sub>N<sub>4</sub>O<sub>2</sub>, 489.2285; found: 489.2291.

### Bis(imidazo[1,2-a]pyridin-3-yl)methane (3o)

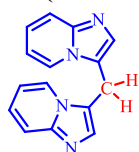

White solid, 36 mg, 36%; TLC (*R<sub>f</sub>*): 0.30 (Hexane/Ethyl Acetate, 50:50); MP: 235-239 °C (219-221 °C)<sup>11</sup>; <sup>1</sup>H NMR (400 MHz, CDCl<sub>3</sub>) δ (ppm): δ 7.93 (*d*, *J* = 6.9 Hz, 2H), 7.64 (*d*, *J* = 9.2 Hz, 2H), 7.49 (*s*, 2H), 7.24 – 7.15 (*m*, 2H), 6.80 (*t*, *J* = 6.9 Hz, 2H), 4.52 (*s*, 2H); <sup>13</sup>C NMR (101 MHz, CDCl<sub>3</sub>) δ (ppm): 146.3, 132.7, 124.2, 123.3, 118.2, 112.7, 20.2.

### Bis(2-methyl-6-phenylimidazo[2,1-b]thiazol-5-yl)methane (4a)

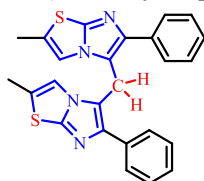

White solid, 53.9 mg, 84%; TLC (*R<sub>f</sub>*): 0.53 (Hexane/Ethyl acetate, 50:50); MP: 235-239 °C; <sup>1</sup>H NMR (400 MHz, CDCl<sub>3</sub>) δ (ppm): 7.74 – 7.71 (*m*, 4H), 7.53 – 7.48 (*m*, 4H), 7.42 – 7.37 (*m*, 2H), 6.19 – 6.17 (*m*, 2H), 4.72 (*s*, 2H), 2.17 – 2.16 (*m*, 6H); <sup>13</sup>C NMR (100 MHz, CDCl<sub>3</sub>) δ (ppm): 148.9, 143.3, 134.8, 129.0, 128.1, 127.7, 126.6, 117.4, 114.1, 21.2, 14.2; HRMS (ESI+) *m/z*: [M+H]<sup>+</sup> calc. for C<sub>25</sub>H<sub>21</sub>N<sub>4</sub>S<sub>2</sub>, 441.1202; found: 441.1208.

### Bis(3-methyl-6-phenylimidazo[2,1-b]thiazol-5-yl)methane (4b)

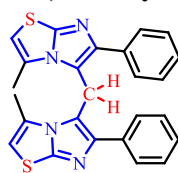

White solid, 56.5 mg, 85%; TLC (*R<sub>f</sub>*): 0.35 (Hexane/Ethyl acetate, 50:50); MP: 198-200 °C; <sup>1</sup>H NMR (400 MHz, CDCl<sub>3</sub>) δ (ppm): 7.27 – 7.23 (*m*, 4H), 7.20 – 7.15 (*m*, 6H), 6.18 (*d*, *J* = 1.2 Hz, 2H), 4.80 (*s*, 2H), 2.33 – 2.33 (*s*, 6H); <sup>13</sup>C NMR (100 MHz, CDCl<sub>3</sub>) δ (ppm): 149.6, 145.6, 134.0, 129.0, 127.9, 127.6, 127.1, 119.0, 107.4, 22.0, 14.4; HRMS (ESI+) *m/z*: [M+H]<sup>+</sup> calc. for C<sub>25</sub>H<sub>21</sub>N<sub>4</sub>S<sub>2</sub>, 441.1202; found: 441.1208.

#### Bis(6-(4-methoxyphenyl)-2-methylimidazo[2,1-b]thiazol-5-yl)methane (4c)

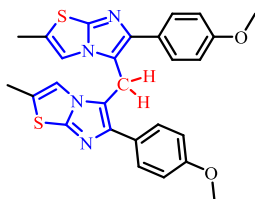

Pale brown solid, 67 mg, 89%; TLC (*R<sub>f</sub>*): 0.65 (Hexane/Ethyl acetate, 50:50); MP: 210-215 °C; <sup>1</sup>H NMR (400 MHz, CDCl<sub>3</sub>) δ (ppm): 7.66 – 7.62 (m, 4H), 7.07 – 6.99 (m, 4H), 6.24 – 6.22 (m, 2H), 4.64 (s, 2H), 3.87 (s, 6H), 2.18 – 2.17 (m, 6H); <sup>13</sup>C NMR (100 MHz, CDCl<sub>3</sub>) δ (ppm): 159.2, 148.6, 143.0, 129.3, 127.3, 126.3, 116.7, 114.4, 114.1, 55.5, 21.2, 14.2; HRMS (ESI+) *m/z*: [M+H]<sup>+</sup> calc. for C<sub>27</sub>H<sub>25</sub>N<sub>4</sub>O<sub>2</sub>S<sub>2</sub>, 501.1413; found: 501.1419.

#### Bis(6-(3-bromophenyl)-2-methylimidazo[2,1-b]thiazol-5-yl)methane (4d)

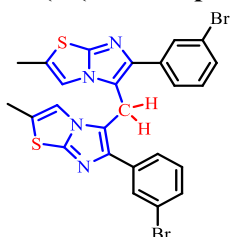

White solid, 52 mg, 58%; TLC (*R<sub>f</sub>*): 0.61 (Hexane/Ethyl acetate, 50:50); MP: 180-185 °C; <sup>1</sup>H NMR (400 MHz, CDCl<sub>3</sub>) δ (ppm): 7.88 (t, *J* = 1.7 Hz, 2H), 7.58 (ddd, *J* = 7.7, *J* = 1.5, *J* = 1.1 Hz, 2H), 7.50 (ddd, *J* = 8.0, *J* = 2.0, *J* = 1.0 Hz, 2H), 7.33 (t, *J* = 7.9 Hz, 2H), 6.23 – 6.22 (m, 2H), 4.65 (s, 2H), 2.21 – 2.21 (m, 6H); <sup>13</sup>C NMR (100 MHz, CDCl<sub>3</sub>) δ (ppm): 149.1, 141.9, 136.6, 131.0, 130.6, 130.3, 127.4, 126.3, 123.1, 117.3, 113.7, 21.2, 14.2; HRMS (ESI+) *m/z*: [M+H]<sup>+</sup> calc. C<sub>25</sub>H<sub>19</sub>Br<sub>2</sub>N<sub>4</sub>S<sub>2</sub>, 598.9392; found: 598.9398.

#### 4,4'-(5,5'-methylenebis(2-methylimidazo[2,1-b]thiazole-6,5-diyl))dibenzonitrile (4e)

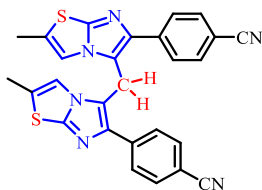

White solid, 46.4 mg, 63%; TLC (*R<sub>f</sub>*): 0.36 (Hexane/Ethyl acetate, 50:50); MP: 200-206 °C; <sup>1</sup>H NMR (400 MHz, CDCl<sub>3</sub>) δ (ppm): 7.81 (m, 4H), 7.74 (m, 4H), 6.33 (d, *J* = 1.5 Hz, 2H), 4.74 (s, 2H), 2.26 – 2.26 (m, 6H); <sup>13</sup>C NMR (101 MHz, CDCl<sub>3</sub>) δ (ppm): 149.7, 141.8, 138.9, 132.7, 128.5, 128.1, 118.9, 117.6, 113.3, 111.1, 22.1, 14.3; HRMS (ESI+) *m/z*: [M+H]<sup>+</sup> calc. for C<sub>27</sub>H<sub>19</sub>N<sub>6</sub>S<sub>2</sub>, 492.1141 found: 492.1140.

## V. REFERENCES

1. H. Jork, W. Funk, W. Fischer, H. Wimmer, *Thin-Layer Chromatography Reagents Detect. Methods*, Vol.1a, VHC, Weinheim, **1990**, p. 497.
2. H. Huang, X. Ji, X. Tang, M. Zhang, X. Li, H. Jiang, *Org. Lett.* **2013**, *15*, 6254–6257.
3. F.-J. Wang, H. Xu, M. Xin, Z. Zhang, *Mol. Divers.* **2016**, *20*, 659–666.
4. S. K. Samanta, M. K. Bera, *Org. Biomol. Chem.* **2019**, *17*, 6441–6449.
5. J. L. Bescont, C. B.-Patient, S. Piguel, *Eur. J. Org. Chem.* **2020**, 2101–2109.
6. N. Gunaganti, A. Kharbanda, N. R. Lakkaniga, L. Zhang, R. Cooper, H.-y. Li, B. Frett, *Chem. Commun.* **2018**, *54*, 12954–12957.
7. Q. Li, M. Zhou, L. Han, Q. Cao, X. Wang, L. Zhao, J. Zhou, H. Zhang, *Chem. Biol. Drug. Des.* **2015**, *86*, 849–856.
8. A. J. Stasyuk, M. Banasiewicz, M. K. Cyranski, D. T. Gryko, *J. Org. Chem.* **2012**, *77*, 5552–5558
9. T. Pyl, R. Giebelmann, H. Beyer, *Liebigs Ann. Chem.* **1961**, *643*, 145–153.
10. A. Kamal, D. Dastagiri, M. J. Ramaiah, J. S. Reddy, E. V. Bharathi, C. Srinivas, S. N. C. V. L. Pushpavalli, D. Pal, M. P.-Bhadra, *Chem. Med. Chem.* **2010**, *5*, 1937–1947.
11. P. Liu, Z. Shen, Y. Yuan, P. Sun. *Org. Biomol. Chem.* **2016**, *14* (27), 6523–6530.
12. P. Kaswan, N. K. Nandwana, B. DeBoef, A. Kumar. *Advanced Synthesis & Catalysis* **2016**, *358* (13), 2108–2115.
13. M. S. Franco, S. Saba, J. Rafique, A. L. Braga. *Angewandte Chemie International Edition* **2021**, *60* (34), 18454–18460.
14. P. P. S. Patel, D. Anand, R. K. Maurya, P. P. Yadav. *J. Org. Chem.* **2016**, *81* (17), 7626–7634.

## VI. <sup>1</sup>H NMR AND <sup>13</sup>C NMR SPECTRA OF COMPOUNDS

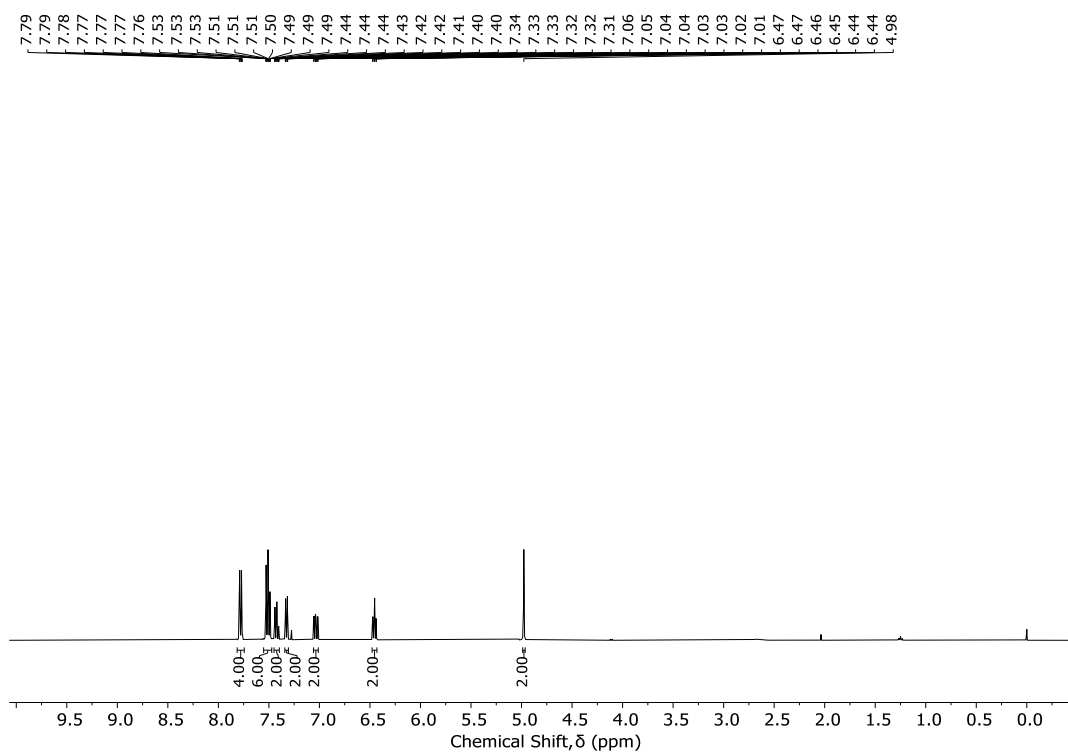

<sup>1</sup>H NMR Spectra of **3a** in CDCl<sub>3</sub> at 400 MHz

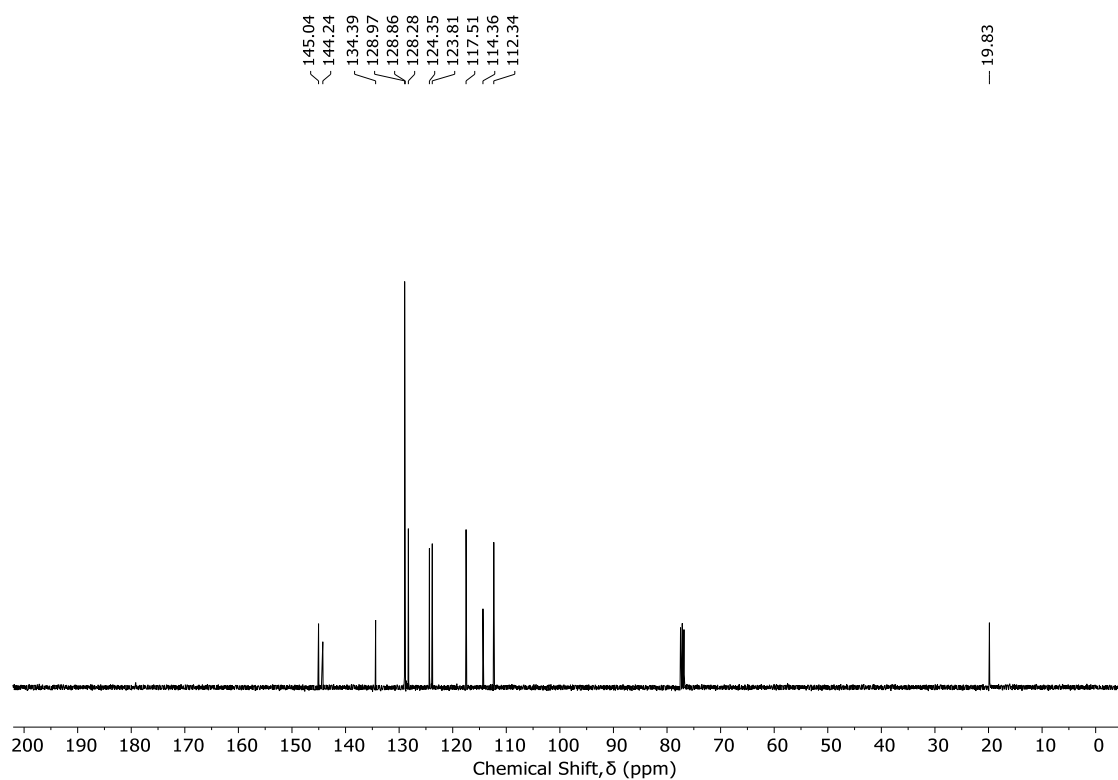

<sup>13</sup>C NMR Spectra of **3a** in CDCl<sub>3</sub> at 100 MHz

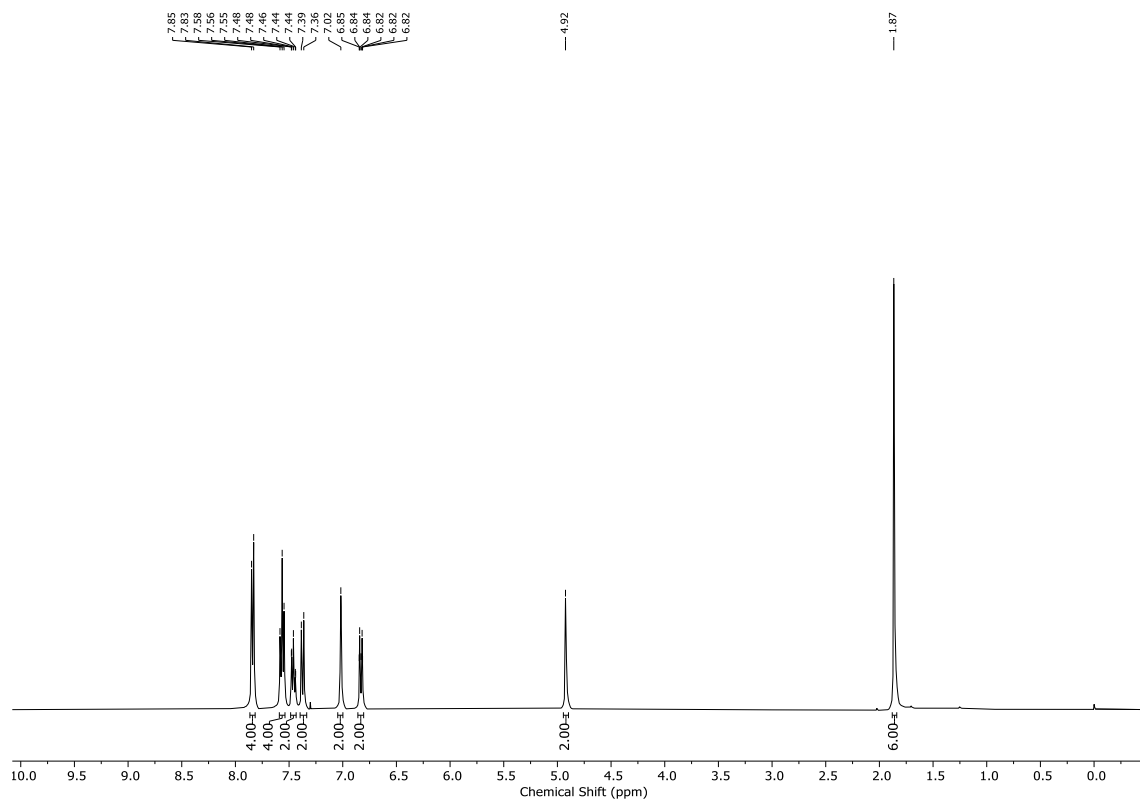

<sup>1</sup>H NMR Spectra of **3b** in CDCl<sub>3</sub> at 400 MHz

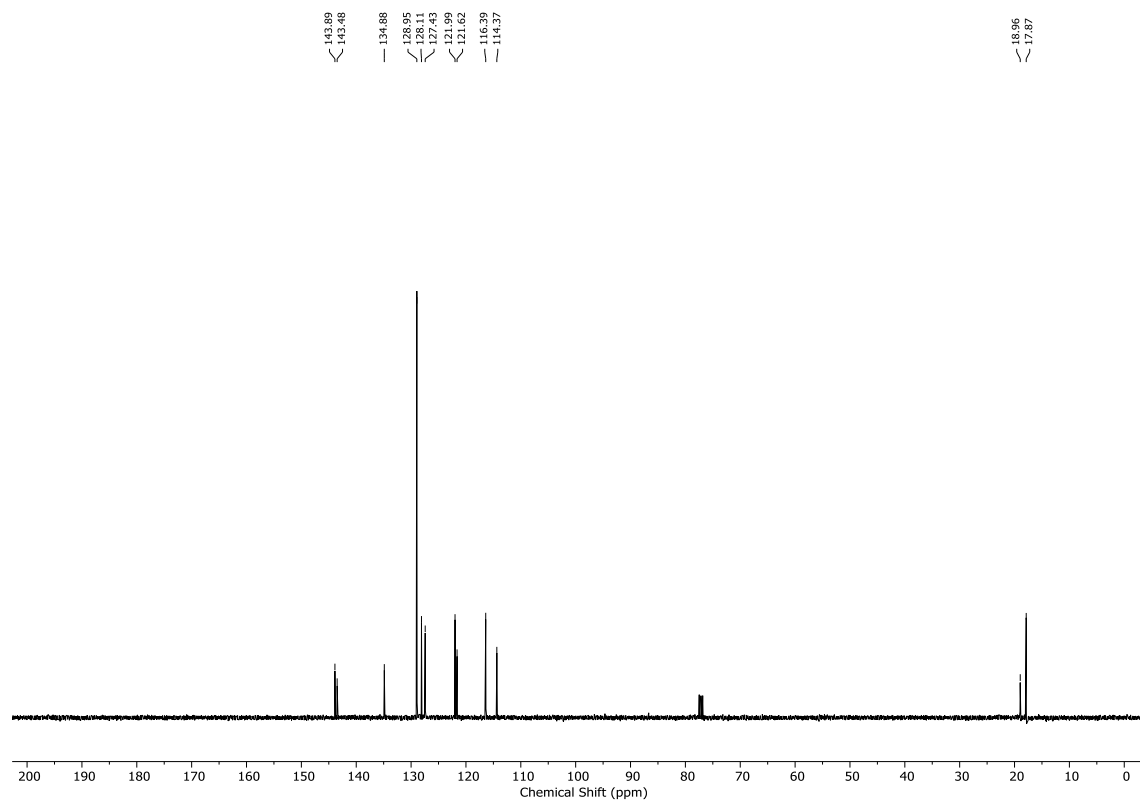

<sup>13</sup>C NMR Spectra of **3b** in CDCl<sub>3</sub> at 100 MHz

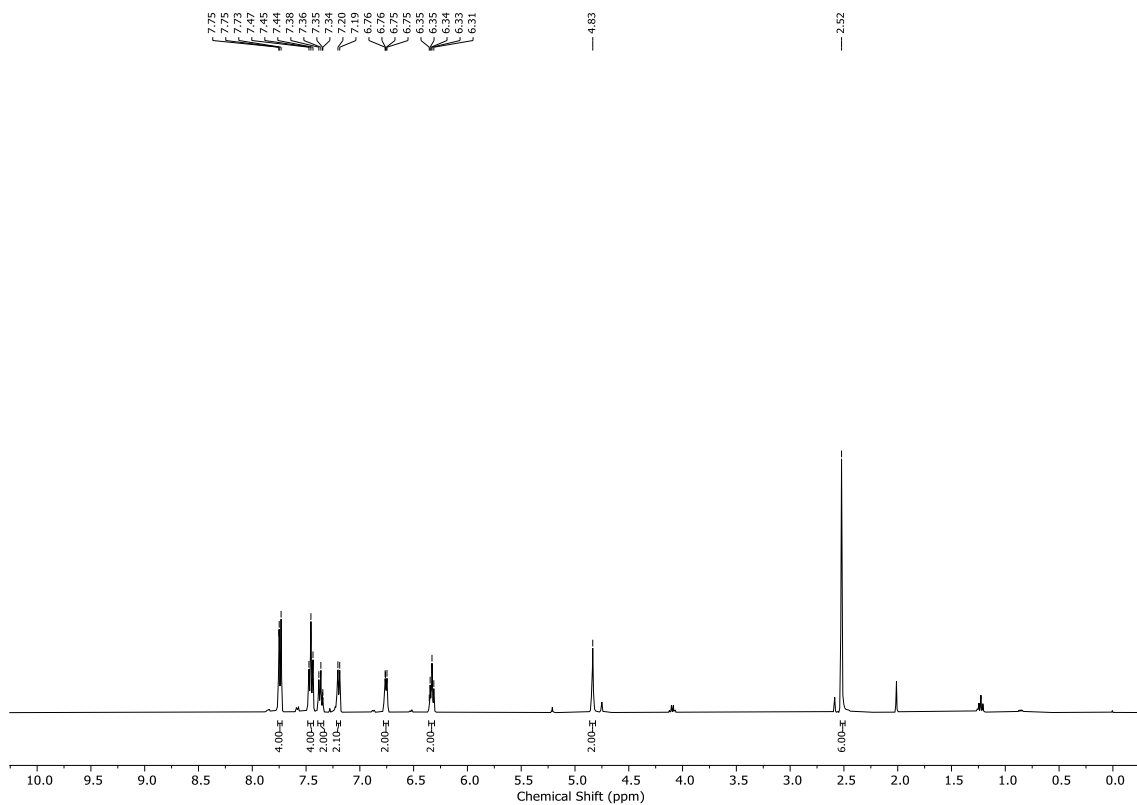

<sup>1</sup>H NMR Spectra of **3c** in CDCl<sub>3</sub> at 400 MHz

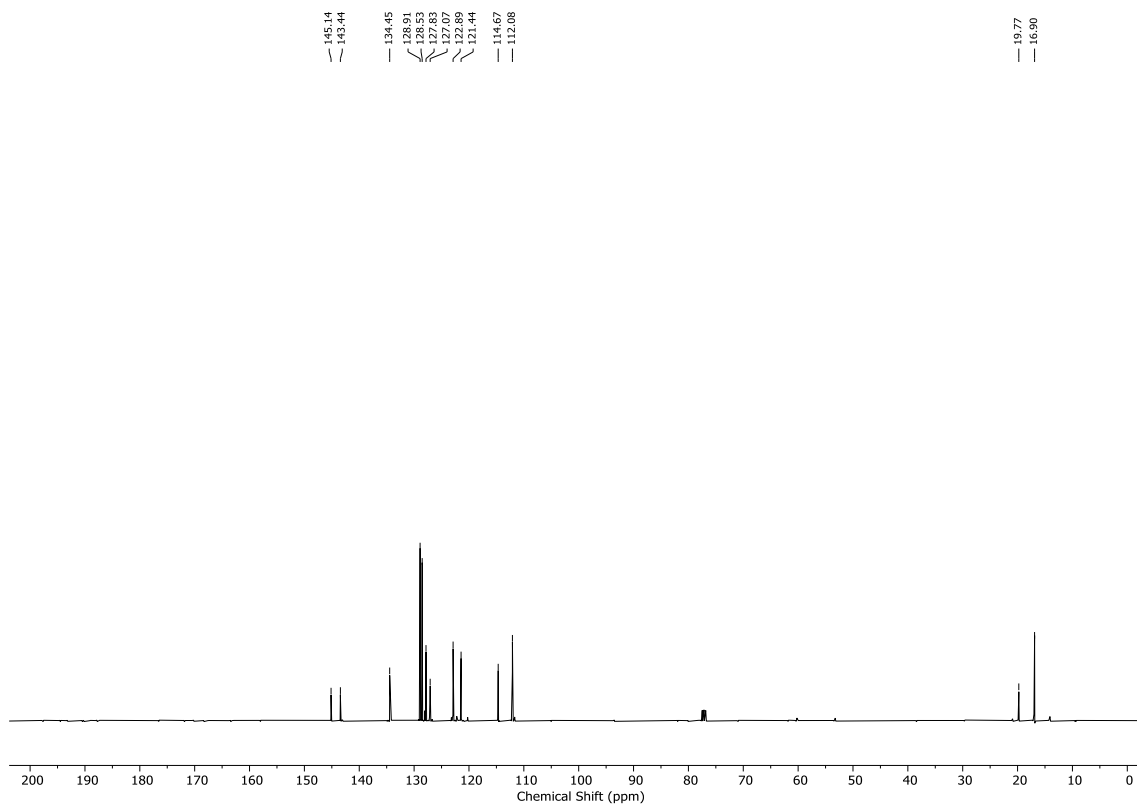

<sup>13</sup>C NMR Spectra of **3c** in CDCl<sub>3</sub> at 100 MHz

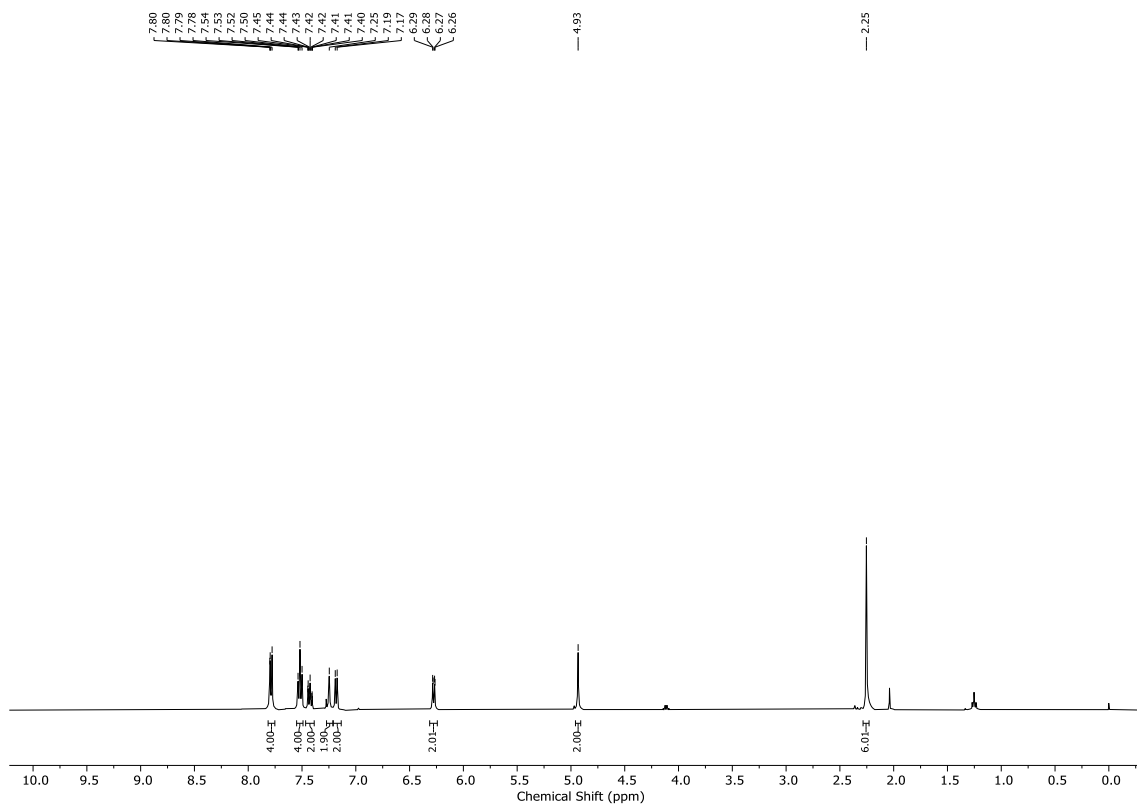

<sup>1</sup>H NMR Spectra of **3d** in CDCl<sub>3</sub> at 400 MHz

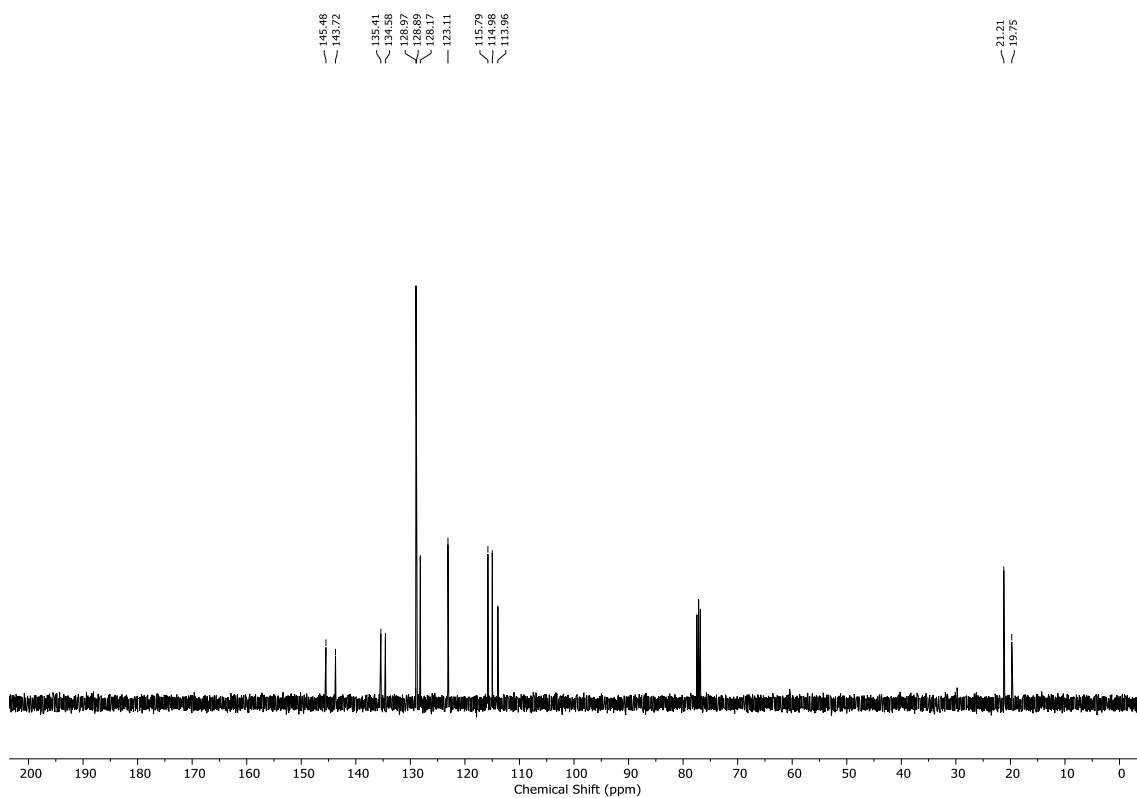

<sup>13</sup>C NMR Spectra of **3d** in CDCl<sub>3</sub> at 100 MHz

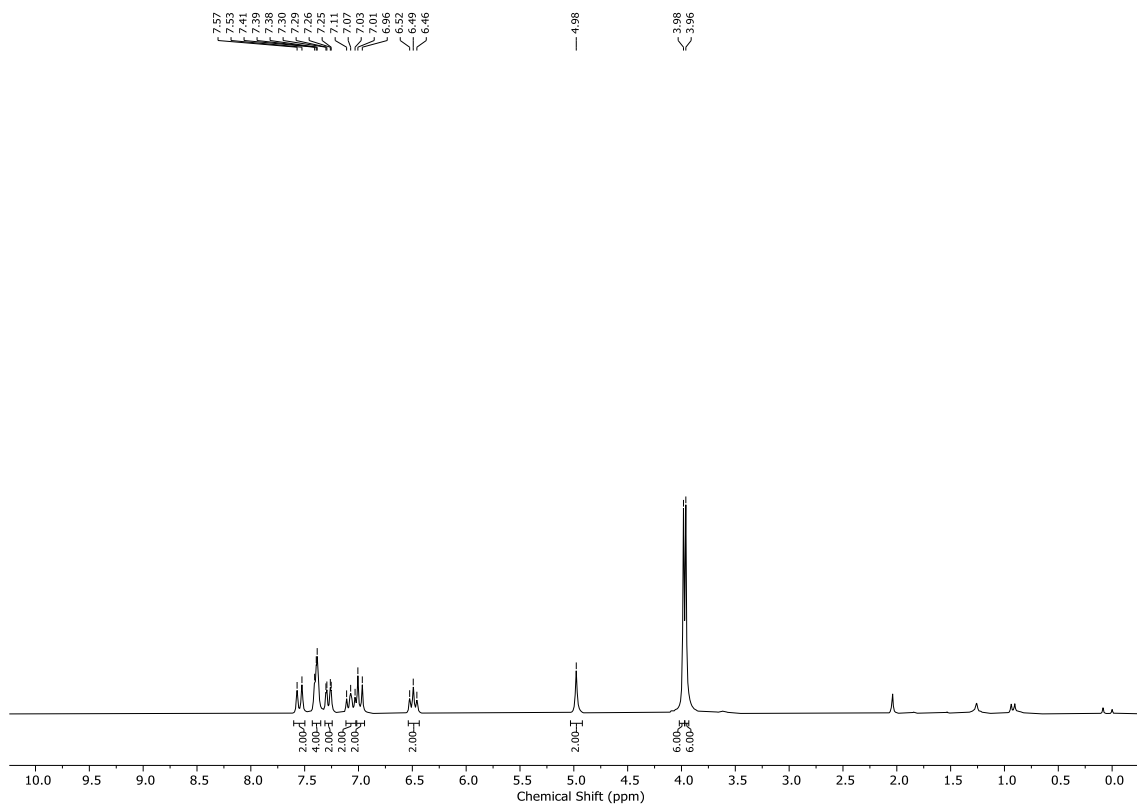

$^1\text{H}$  NMR Spectra of **3e** in  $\text{CDCl}_3$  at 200 MHz

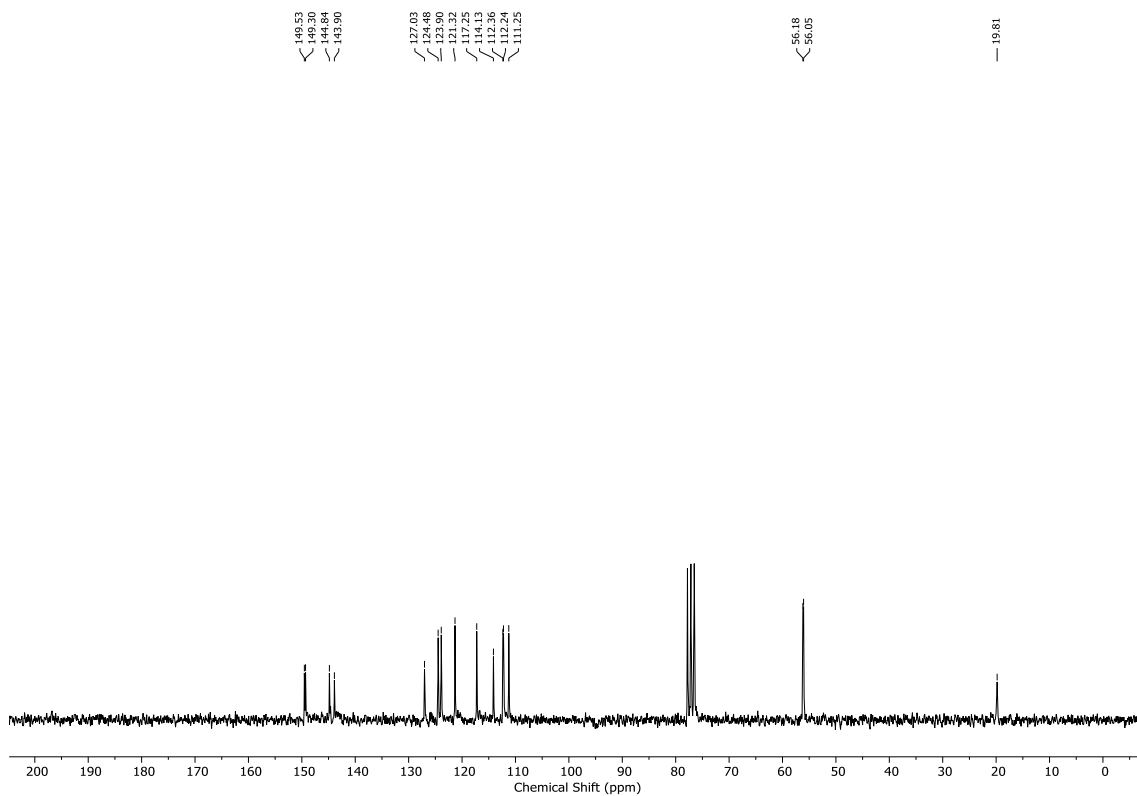

$^{13}\text{C}$  NMR Spectra of **3e** in  $\text{CDCl}_3$  at 50 MHz

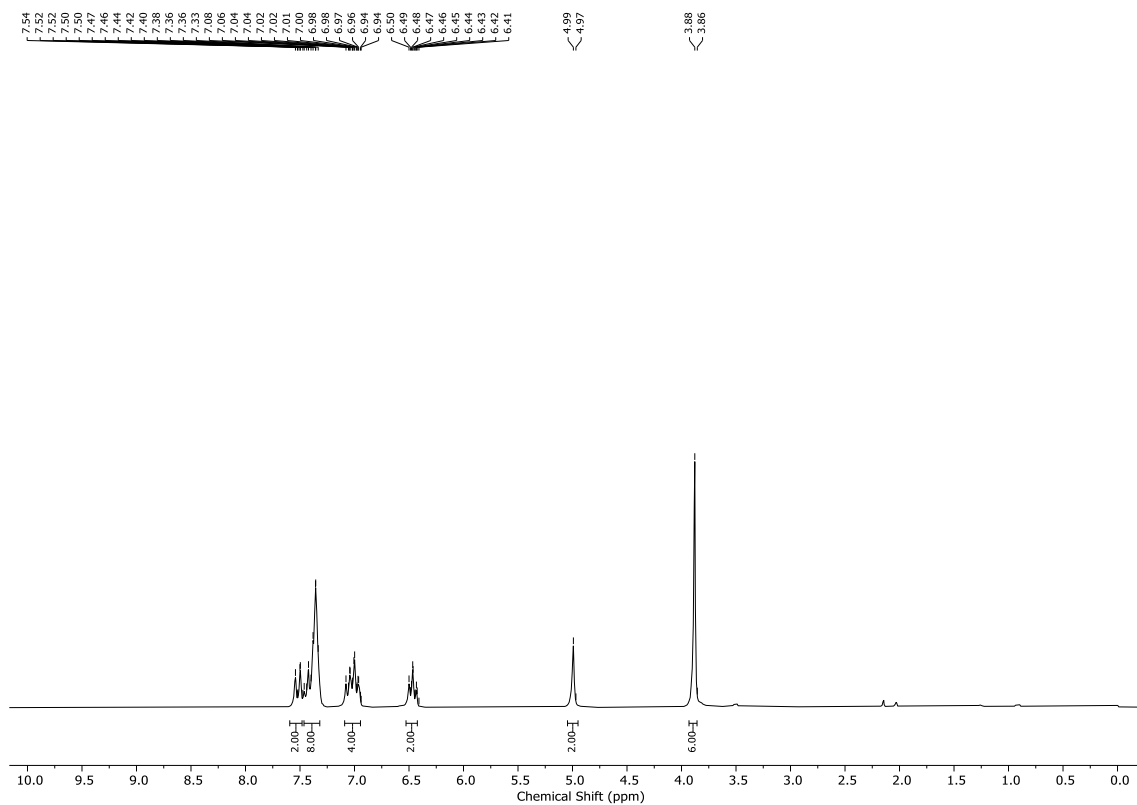

$^1\text{H}$  NMR Spectra of **3f** in  $\text{CDCl}_3$  at 200 MHz

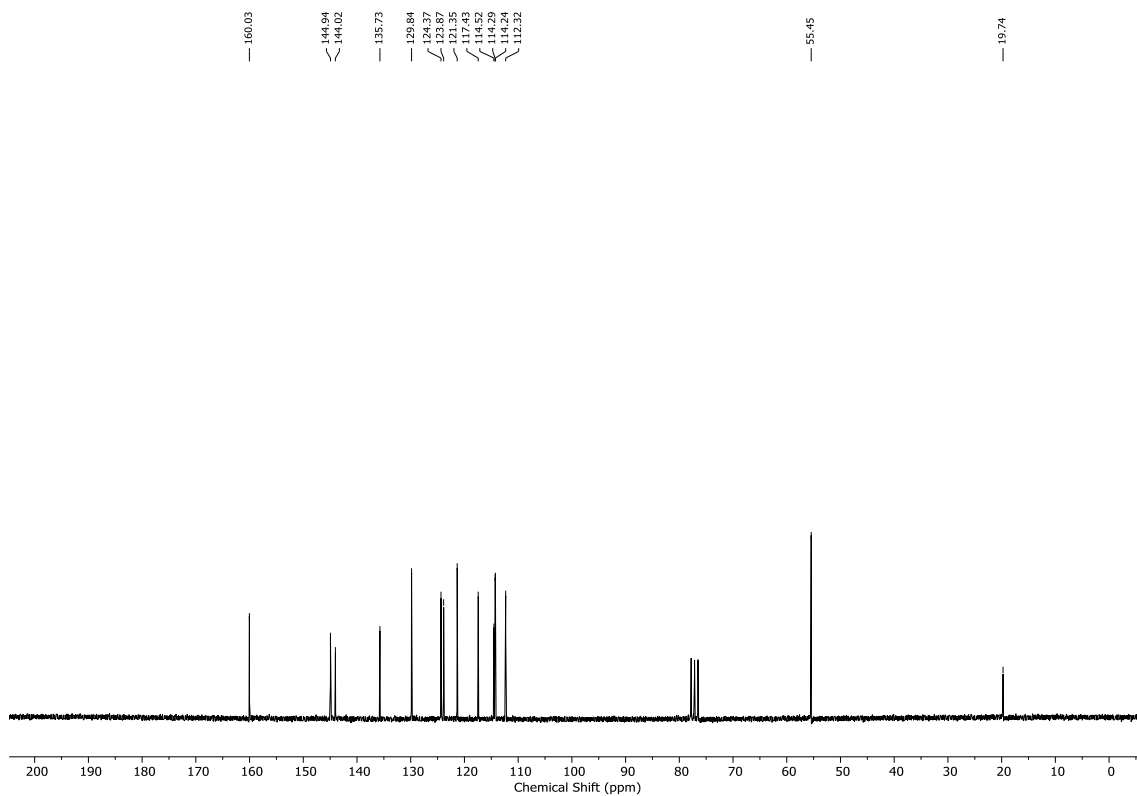

$^{13}\text{C}$  NMR Spectra of **3f** in  $\text{CDCl}_3$  at 50 MHz

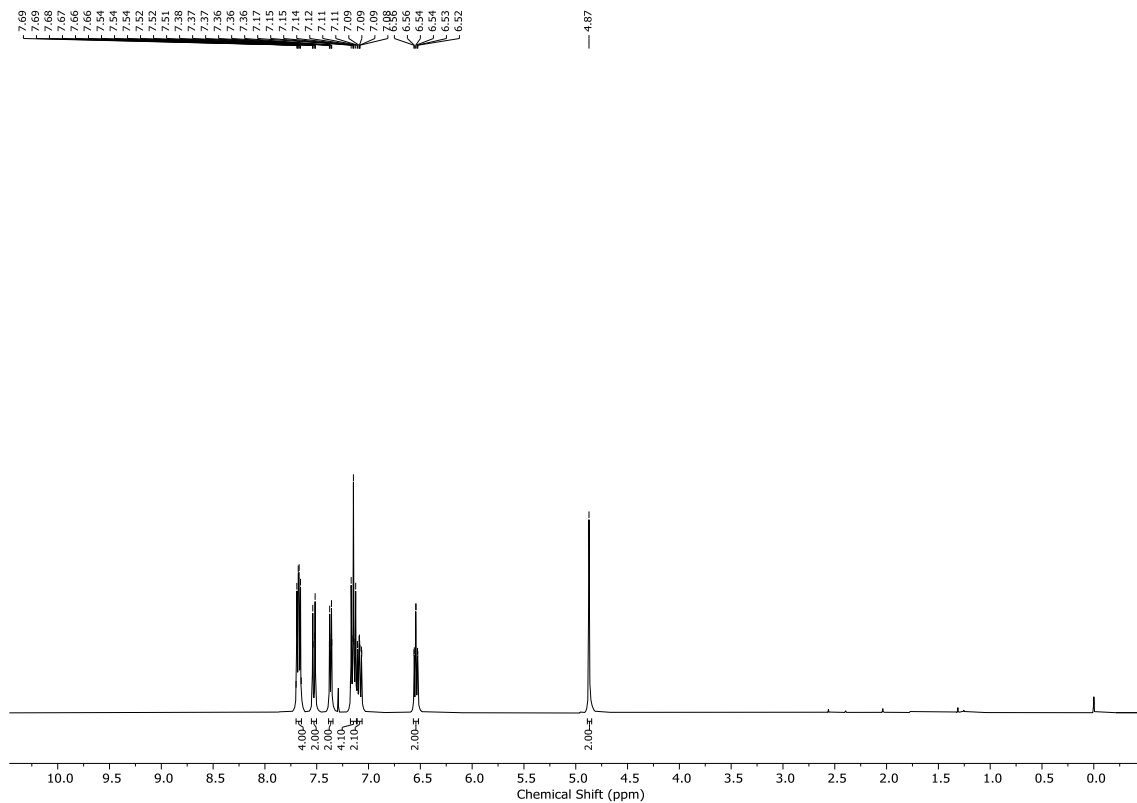

<sup>1</sup>H NMR Spectra of **3g** in CDCl<sub>3</sub> at 400 MHz

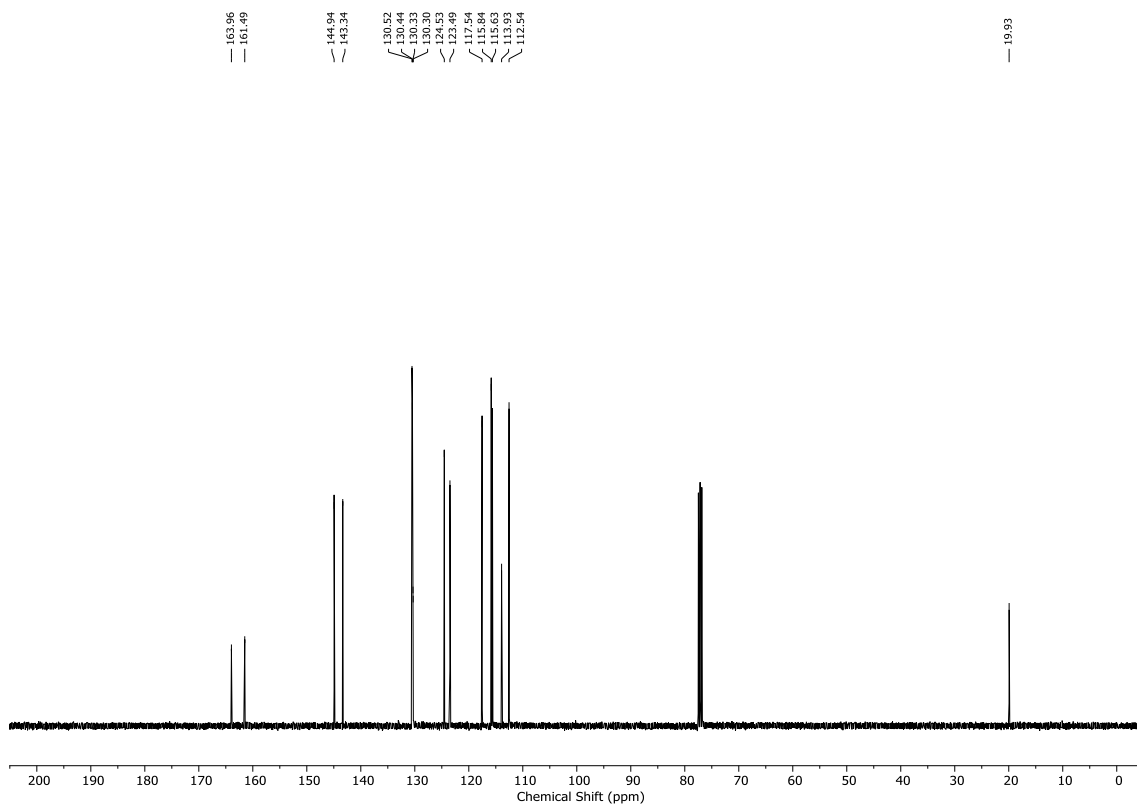

<sup>13</sup>C NMR Spectra of **3g** in CDCl<sub>3</sub> at 100 MHz

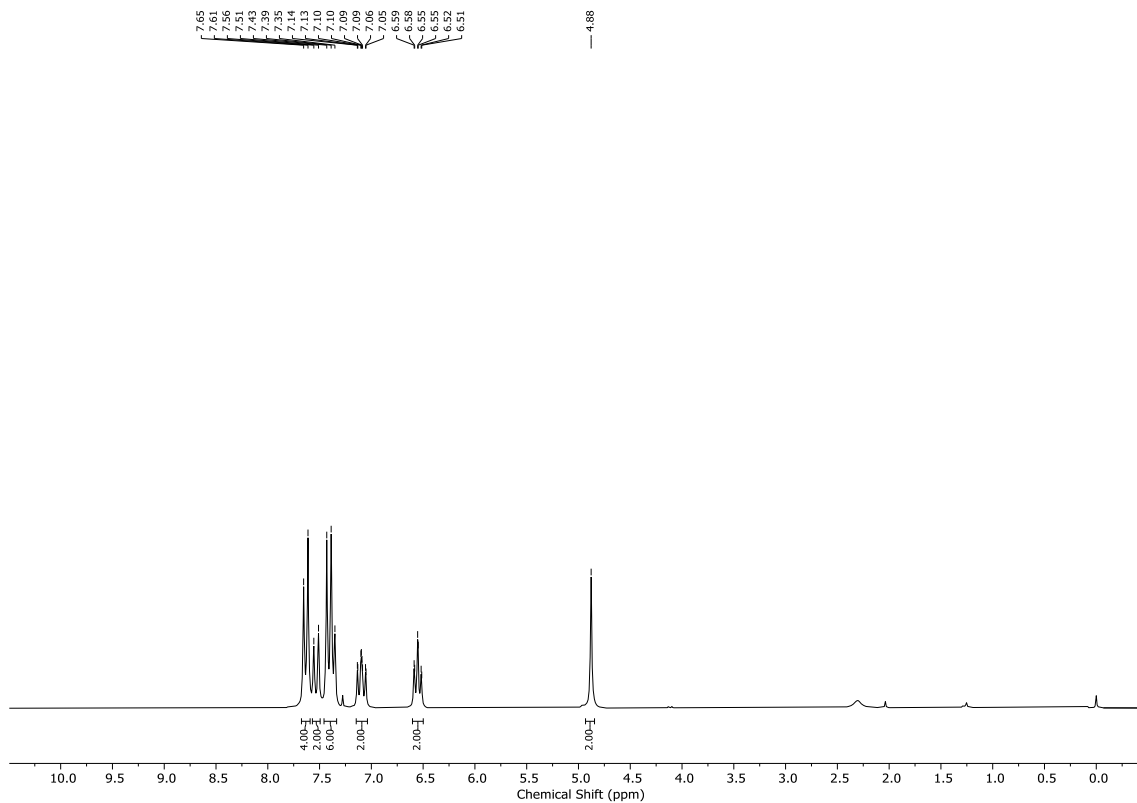

<sup>1</sup>H NMR Spectra of **3h** in CDCl<sub>3</sub> at 200 MHz

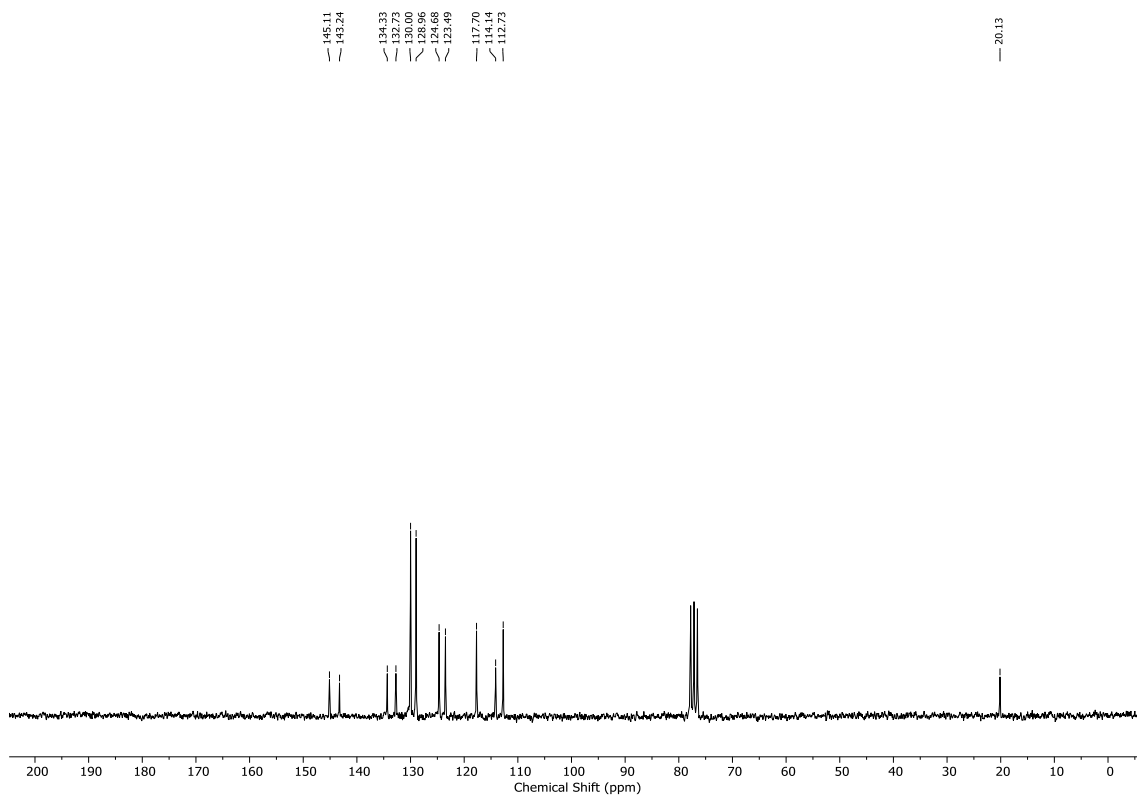

<sup>13</sup>C NMR Spectra of **3h** in CDCl<sub>3</sub> at 50 MHz

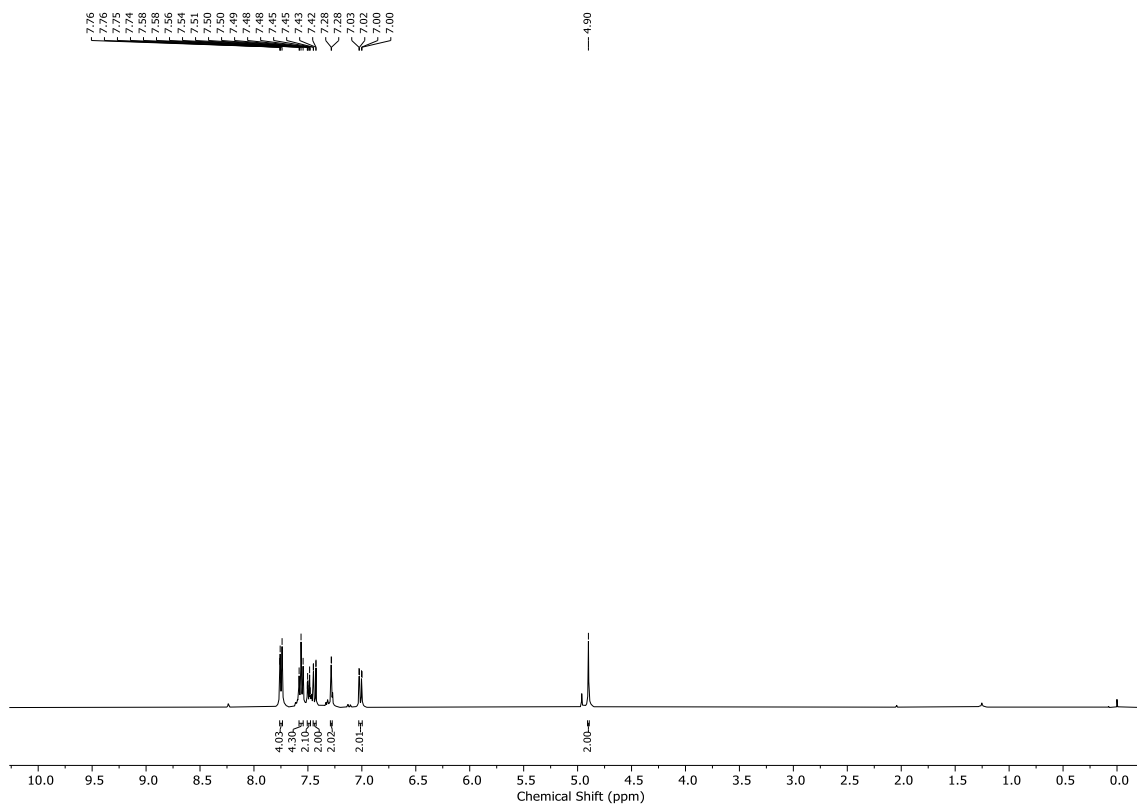

$^1\text{H}$  NMR Spectra of **3i** in  $\text{CDCl}_3$  at 400 MHz

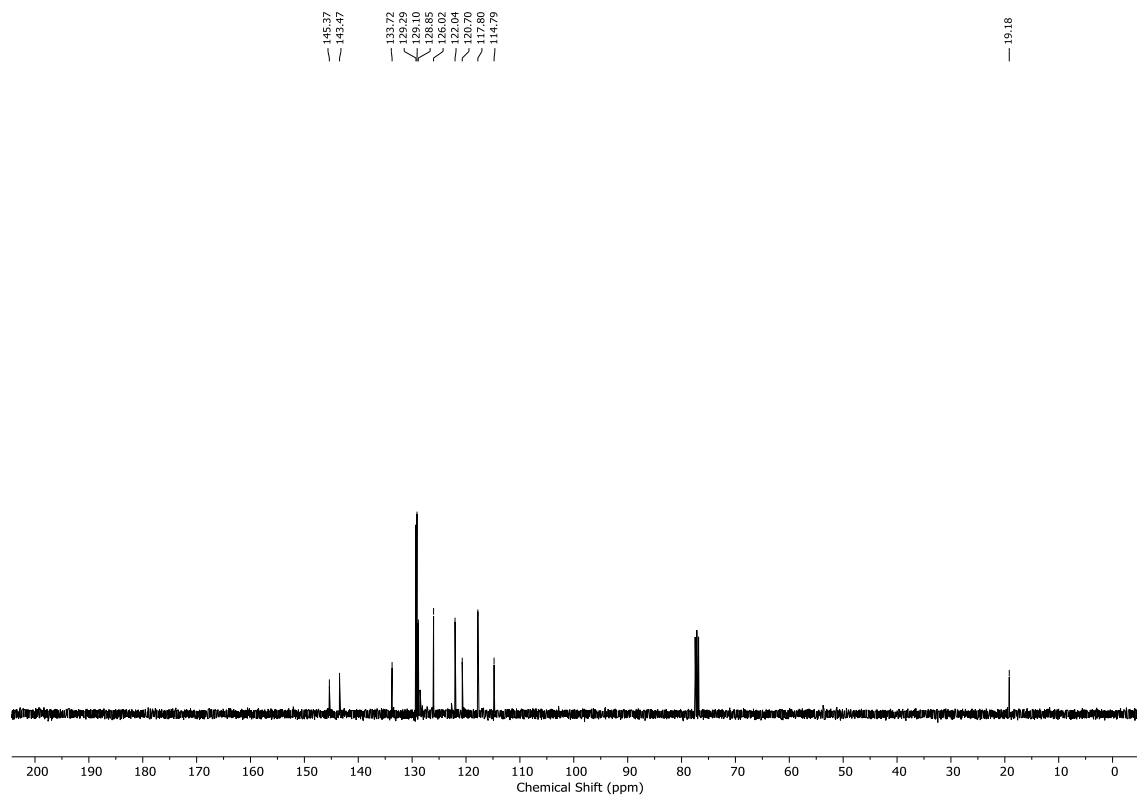

$^{13}\text{C}$  NMR Spectra of **3i** in  $\text{CDCl}_3$  at 100 MHz

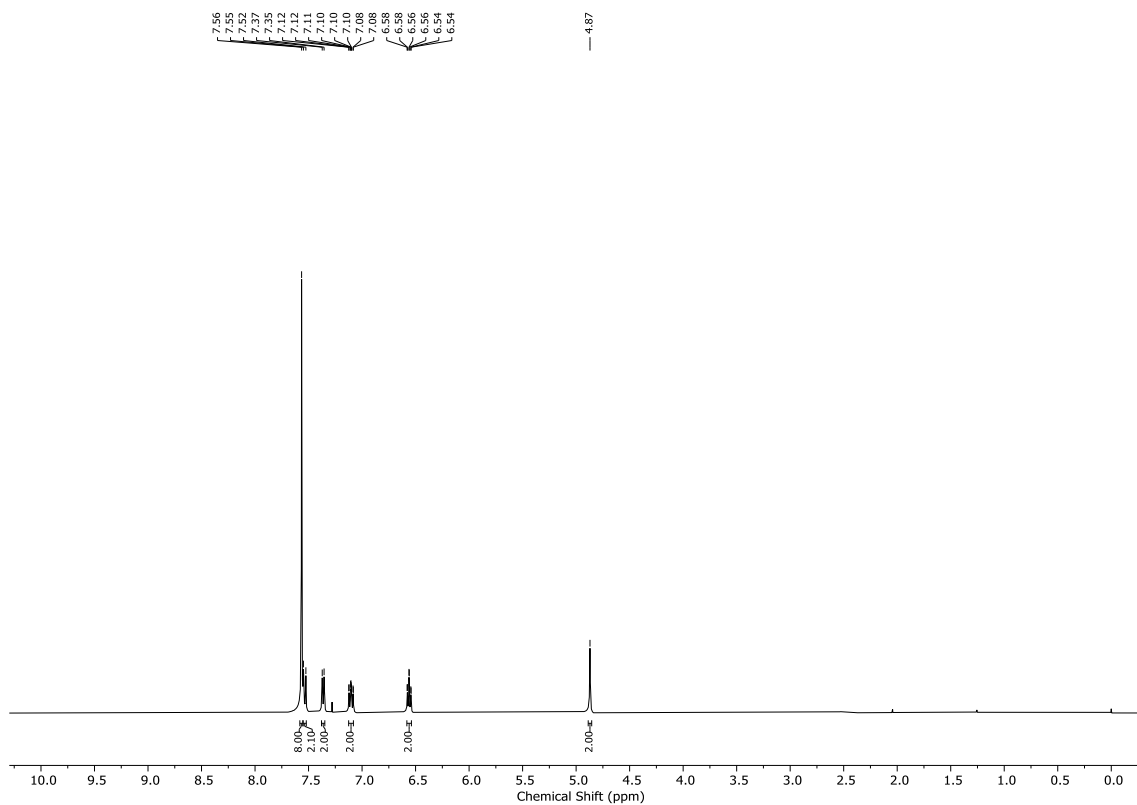

$^1\text{H}$  NMR Spectra of **3j** in  $\text{CDCl}_3$  at 400 MHz

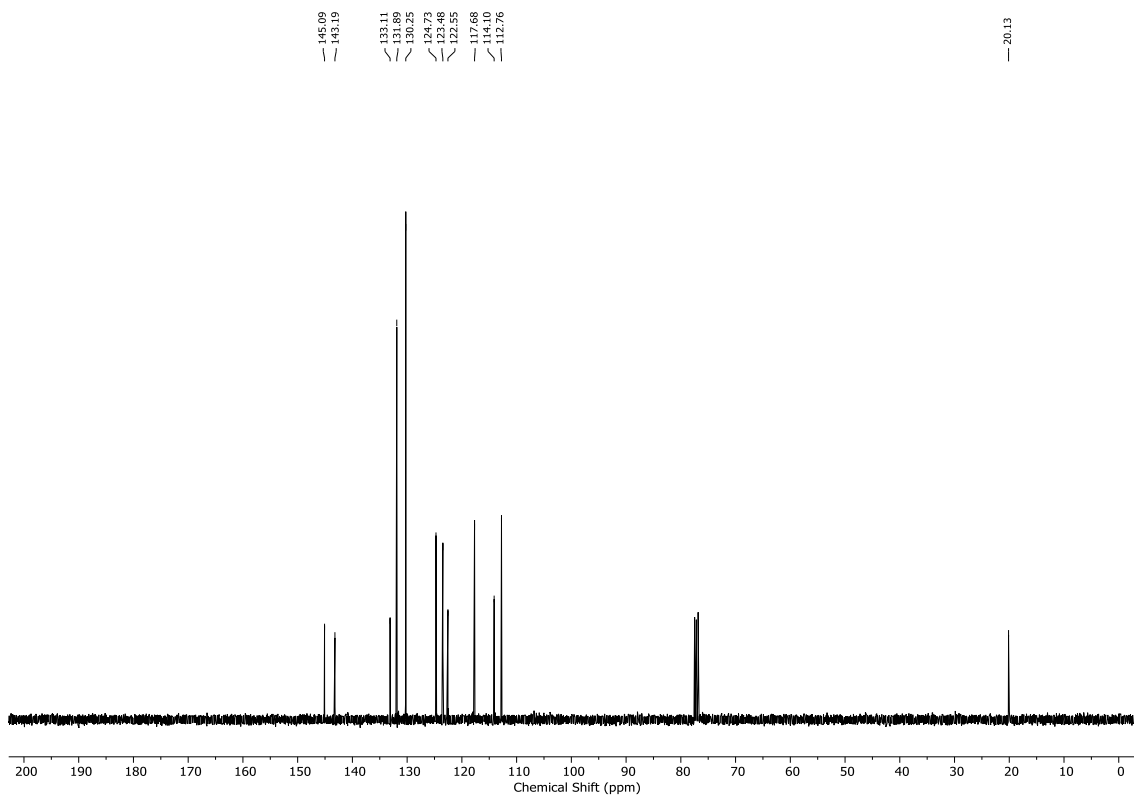

$^{13}\text{C}$  NMR Spectra of **3j** in  $\text{CDCl}_3$  at 100 MHz

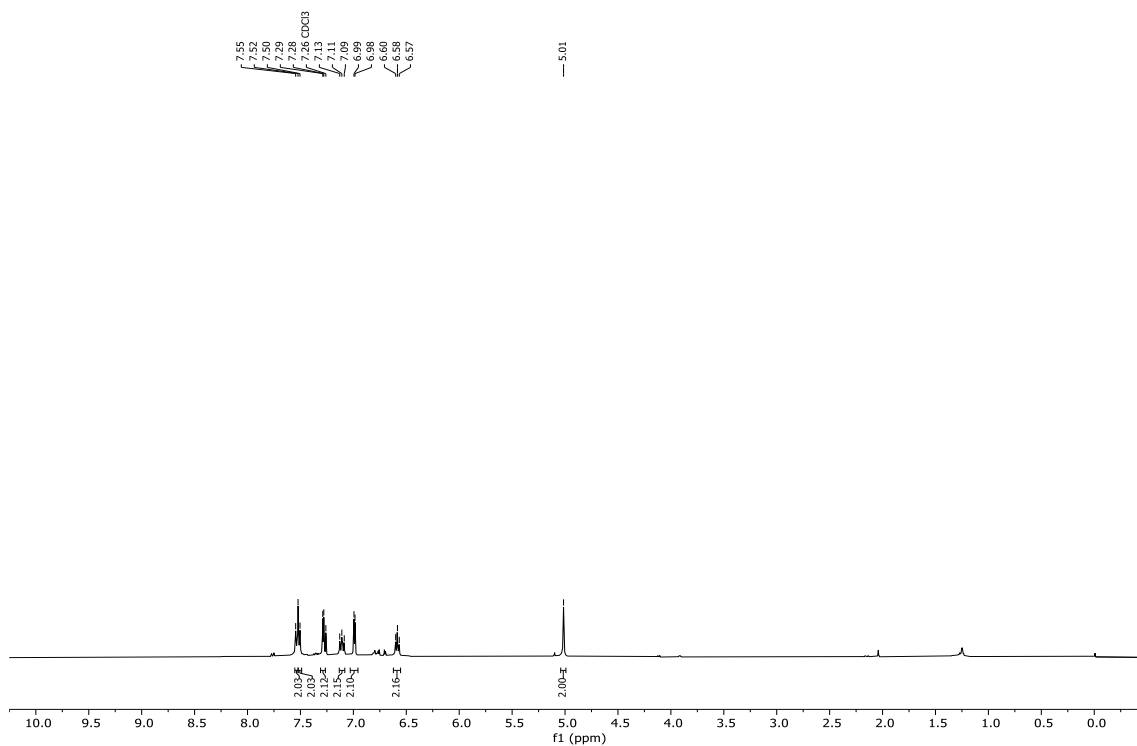

<sup>1</sup>H NMR Spectra of **3k** in CDCl<sub>3</sub> at 400 MHz

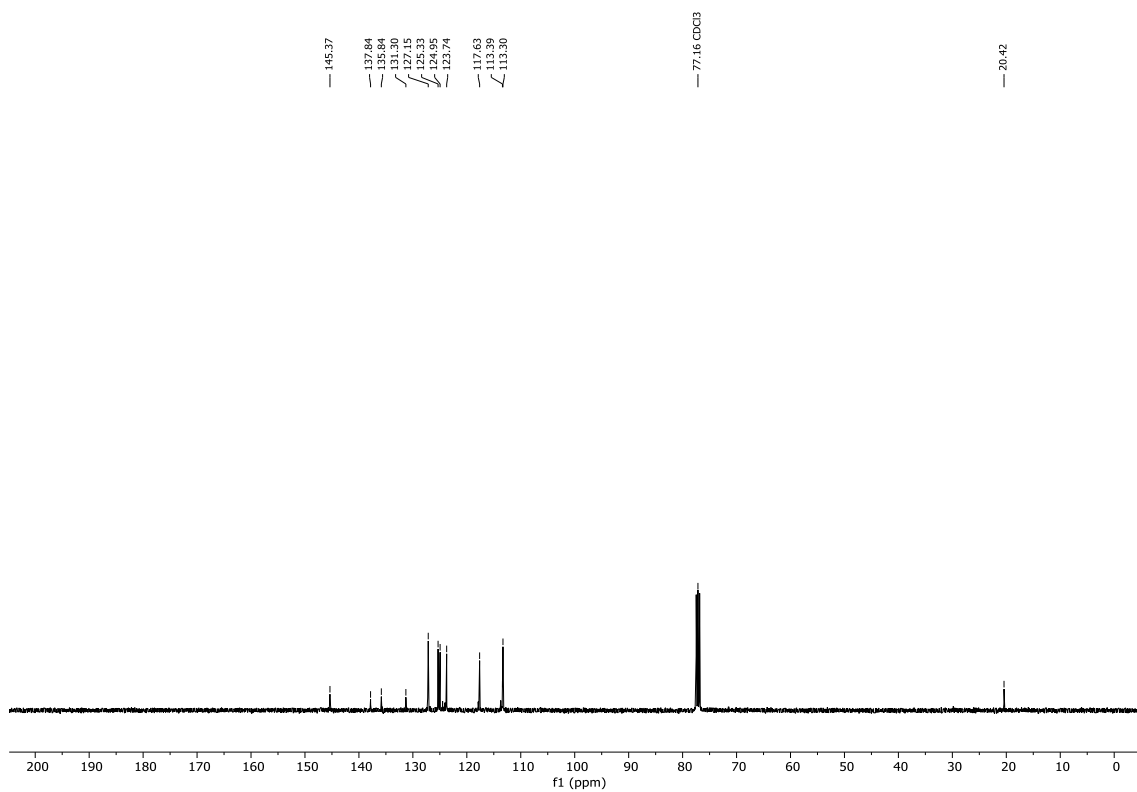

<sup>13</sup>C NMR Spectra of **3k** in CDCl<sub>3</sub> at 100 MHz

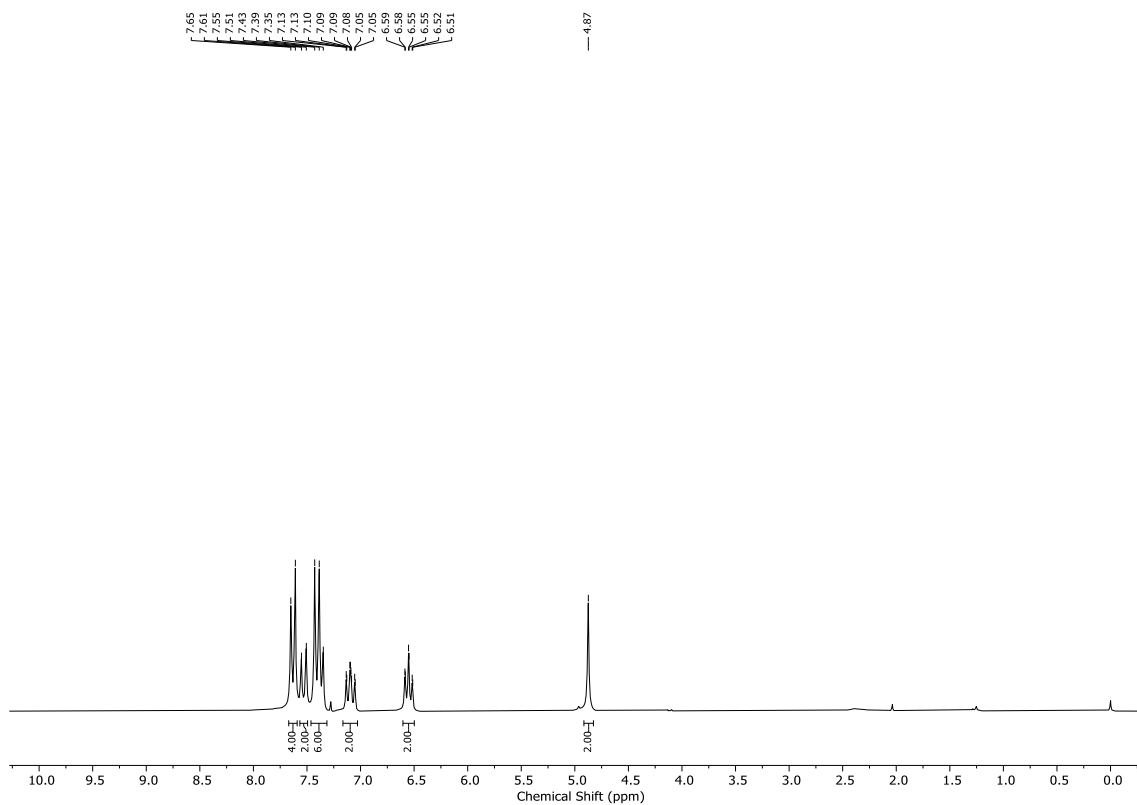

<sup>1</sup>H NMR Spectra of **3I** in CDCl<sub>3</sub> at 200 MHz

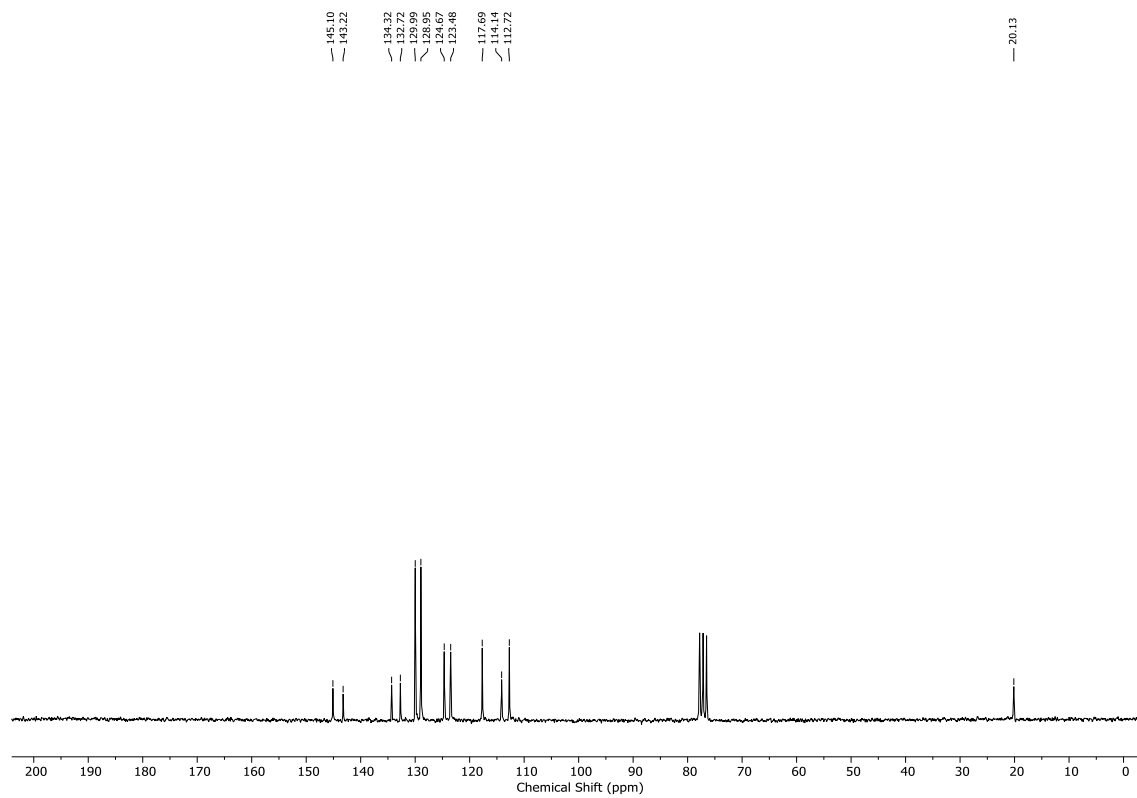

<sup>13</sup>C NMR Spectra of **3I** in CDCl<sub>3</sub> at 50 MHz

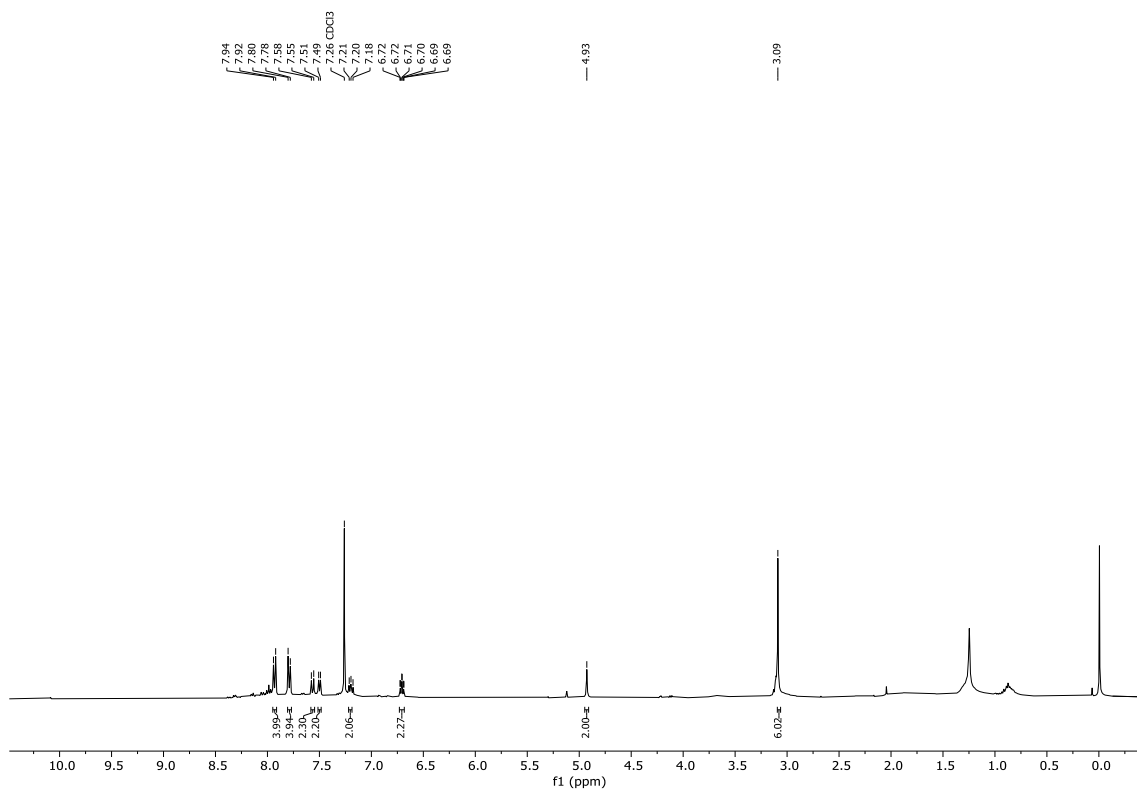

<sup>1</sup>H NMR Spectra of **3m** in CDCl<sub>3</sub> at 400 MHz

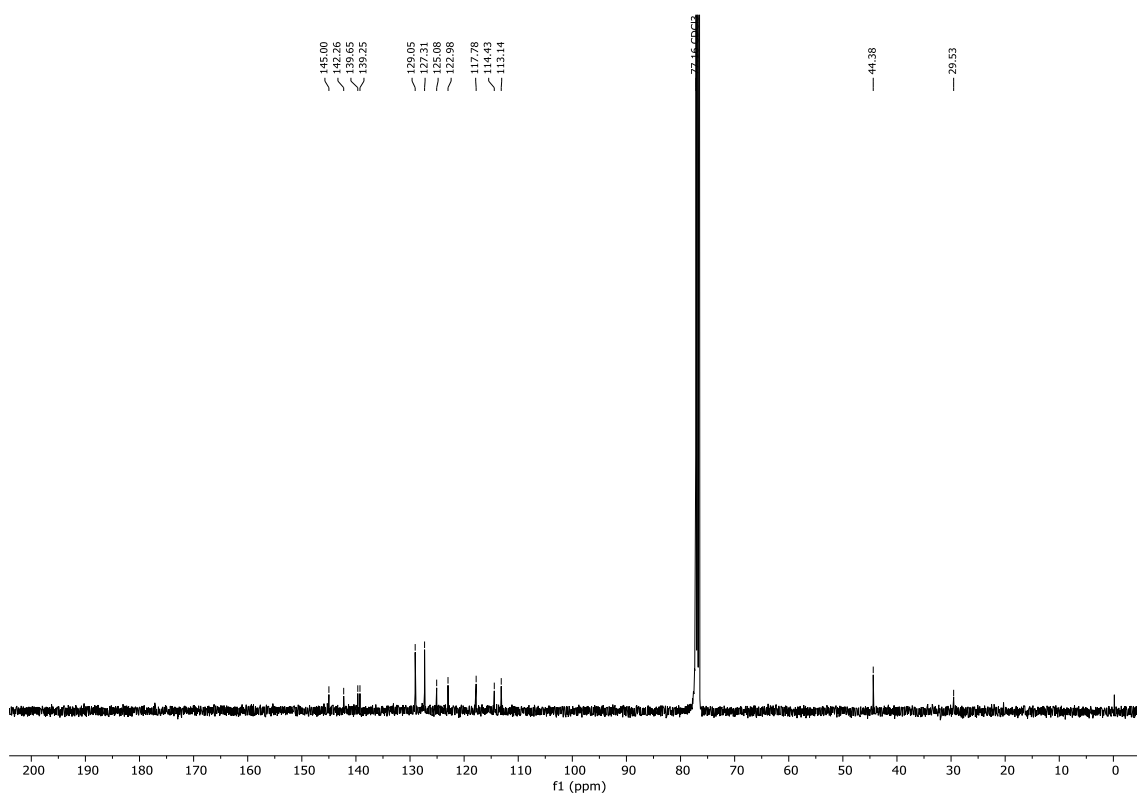

<sup>13</sup>C NMR Spectra of **3m** in CDCl<sub>3</sub> at 100 MHz

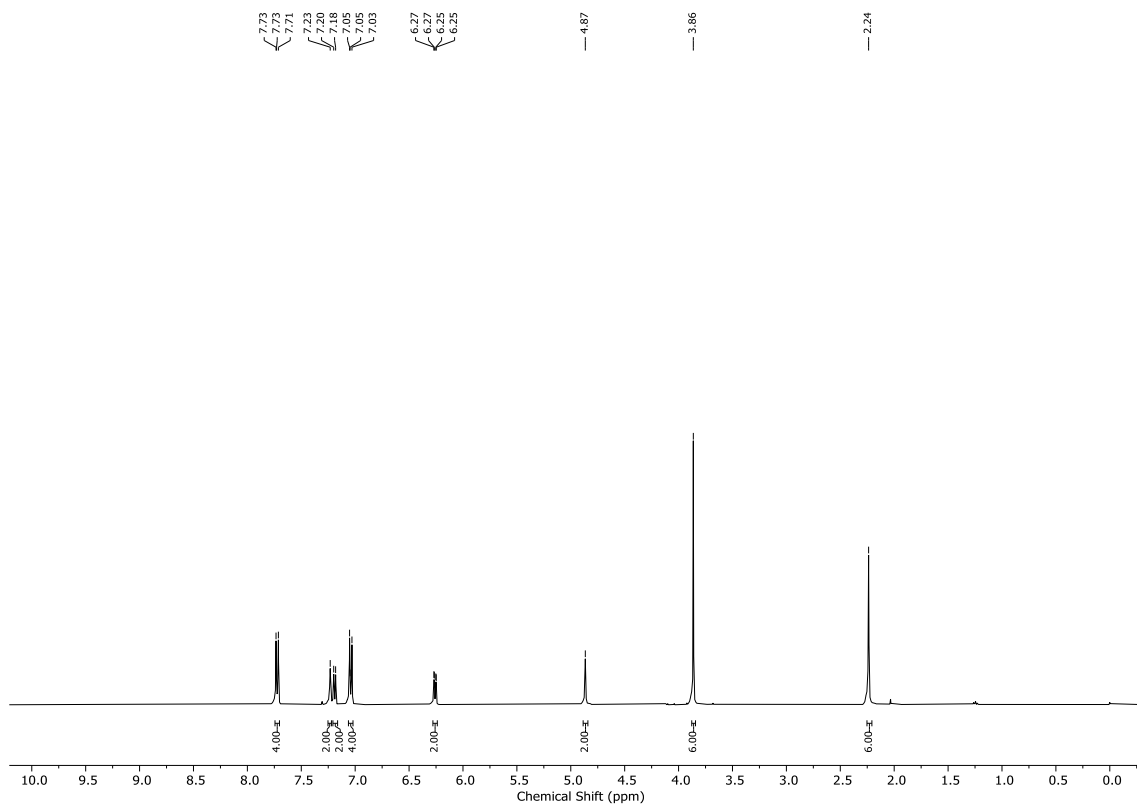

<sup>1</sup>H NMR Spectra of **3n** in CDCl<sub>3</sub> at 400 MHz

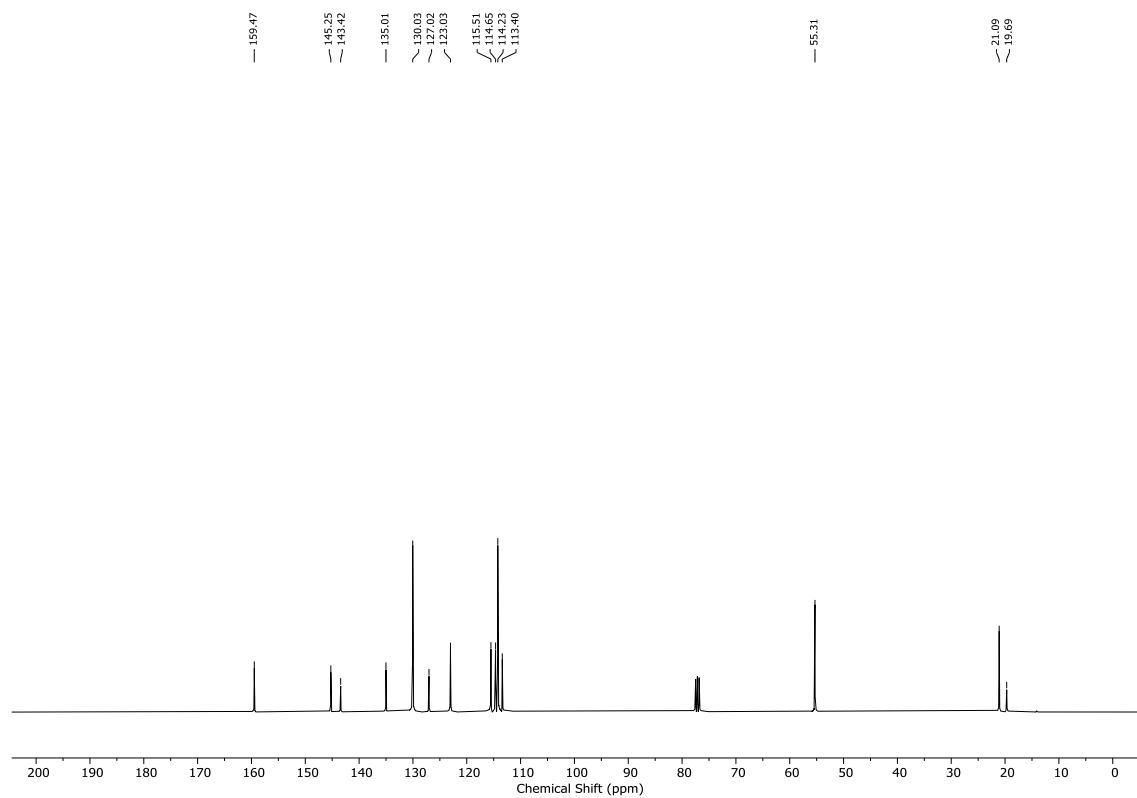

<sup>13</sup>C NMR Spectra of **3n** in CDCl<sub>3</sub> at 100 MHz

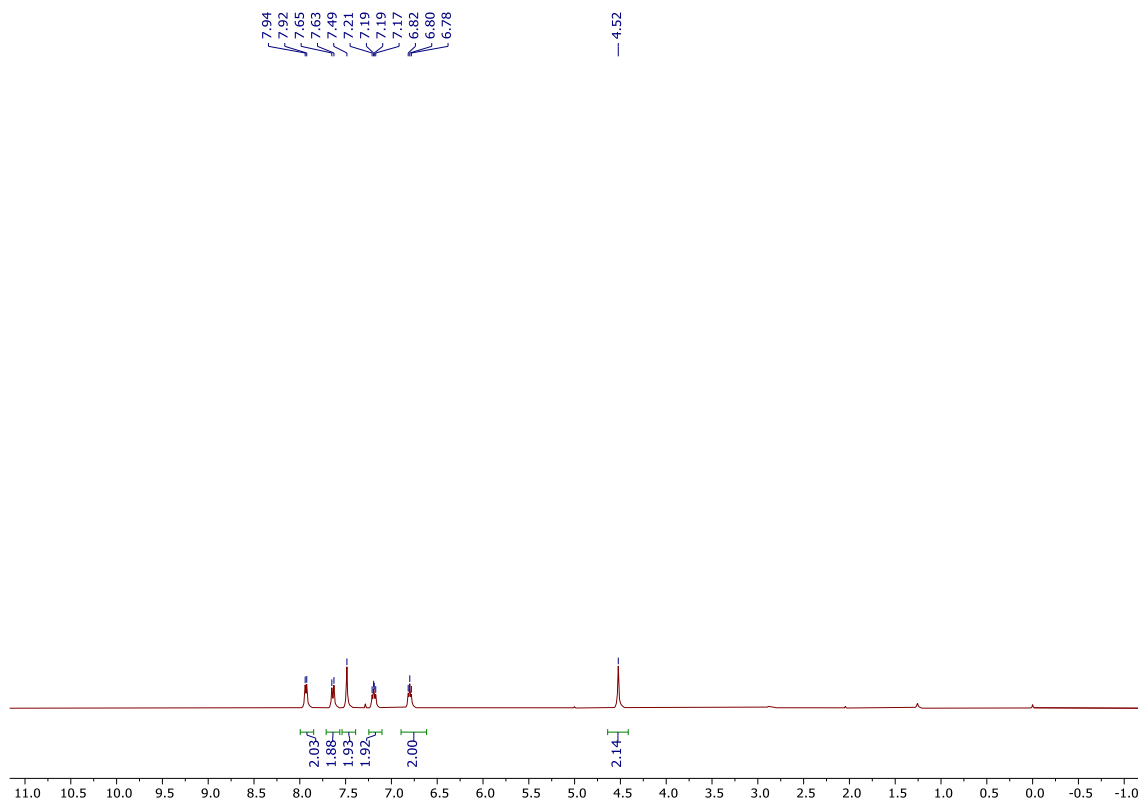

<sup>1</sup>H NMR Spectra of **3o** in CDCl<sub>3</sub> at 400 MHz

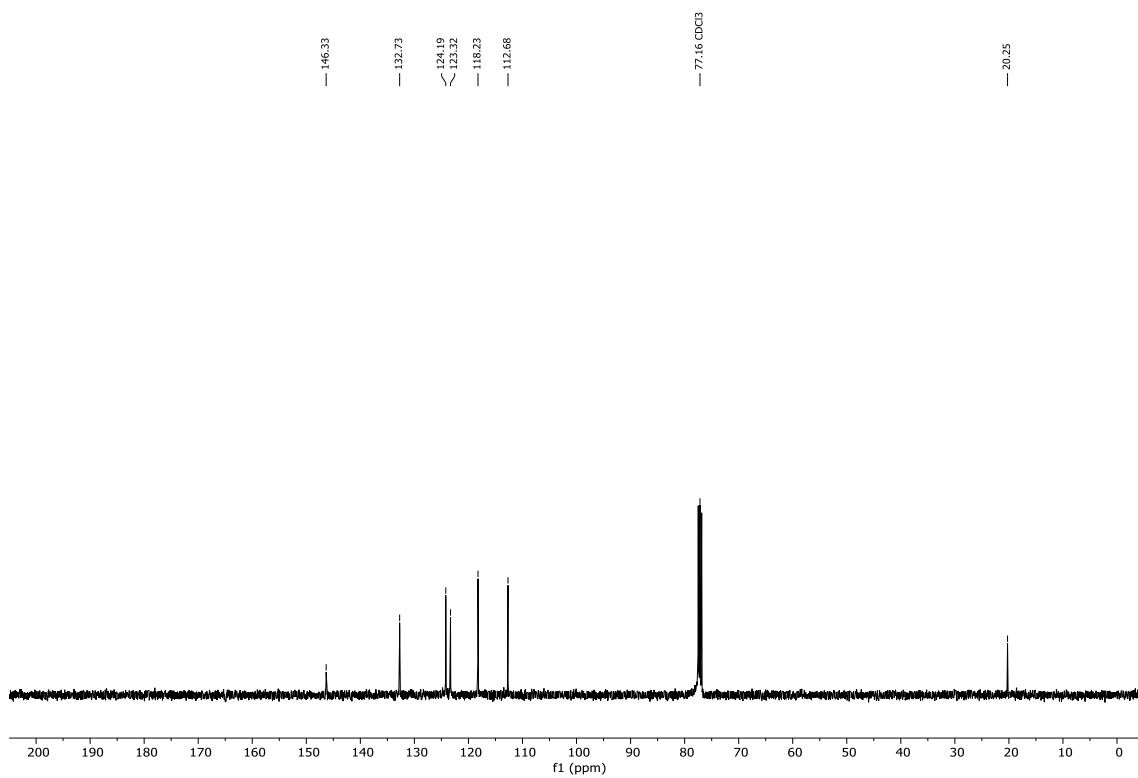

<sup>13</sup>C NMR Spectra of **3o** in CDCl<sub>3</sub> at 100 MHz

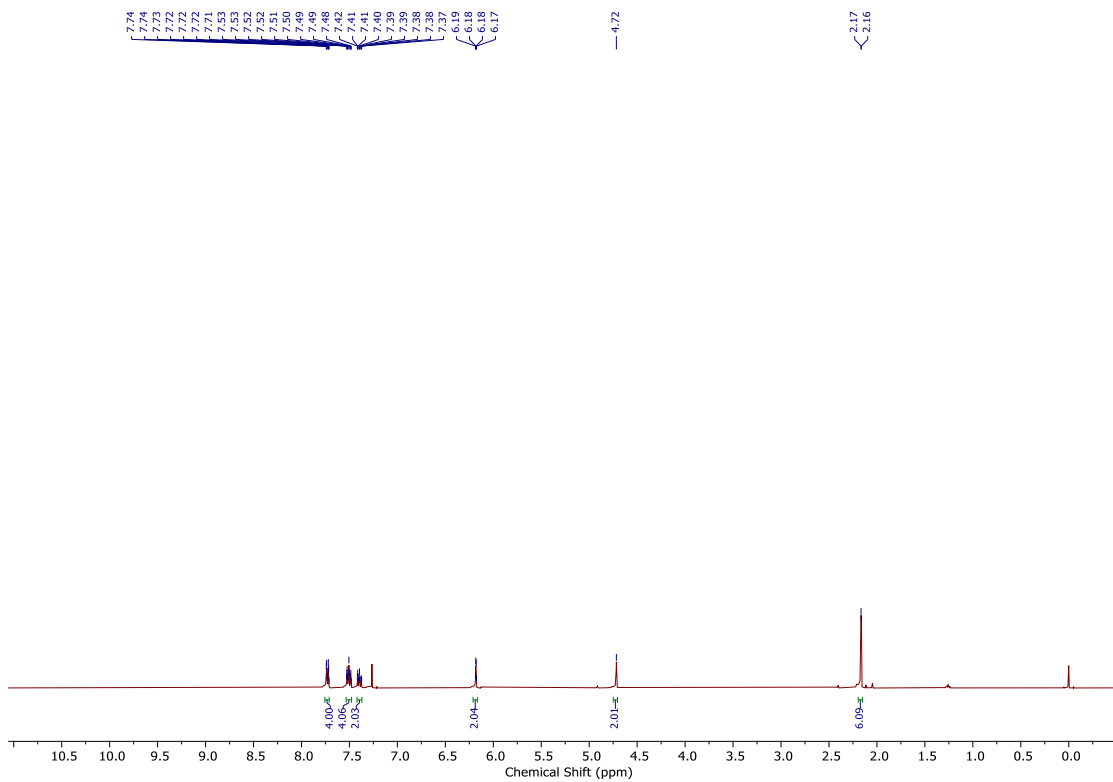

$^1\text{H}$  NMR Spectra of **4a** in  $\text{CDCl}_3$  at 400 MHz

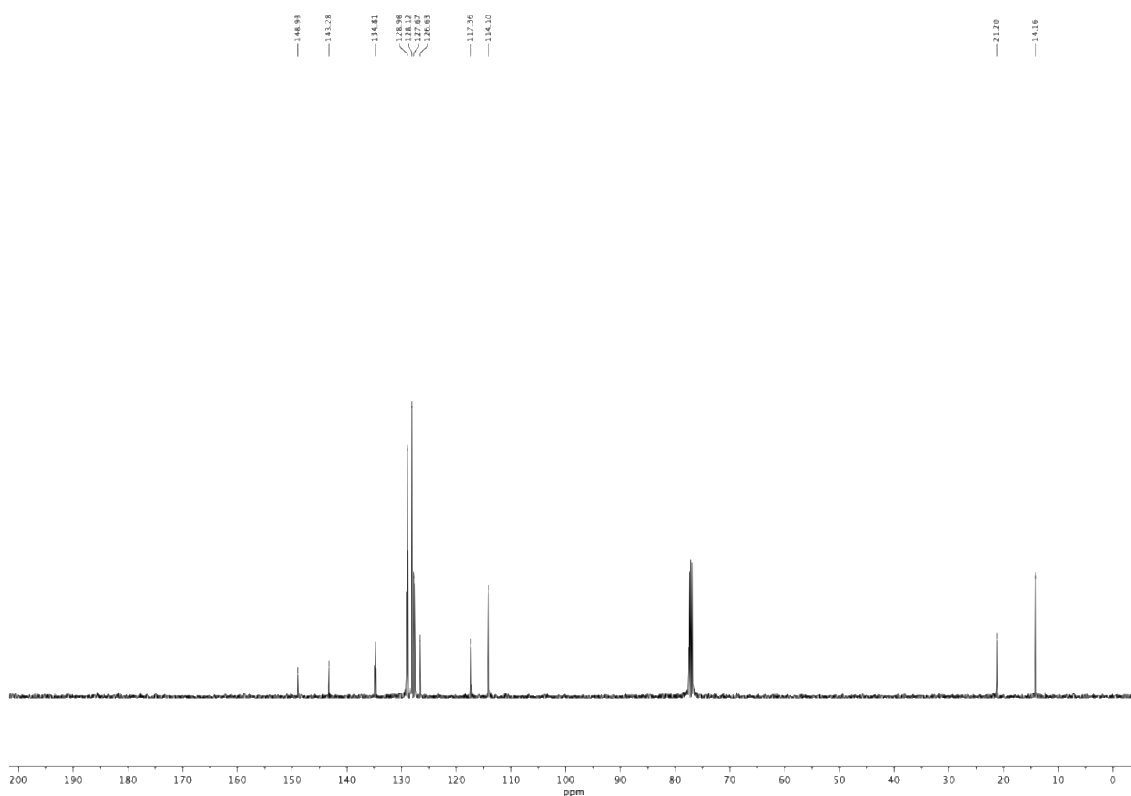

$^{13}\text{C}$  NMR Spectra of **4a** in  $\text{CDCl}_3$  at 100 MHz

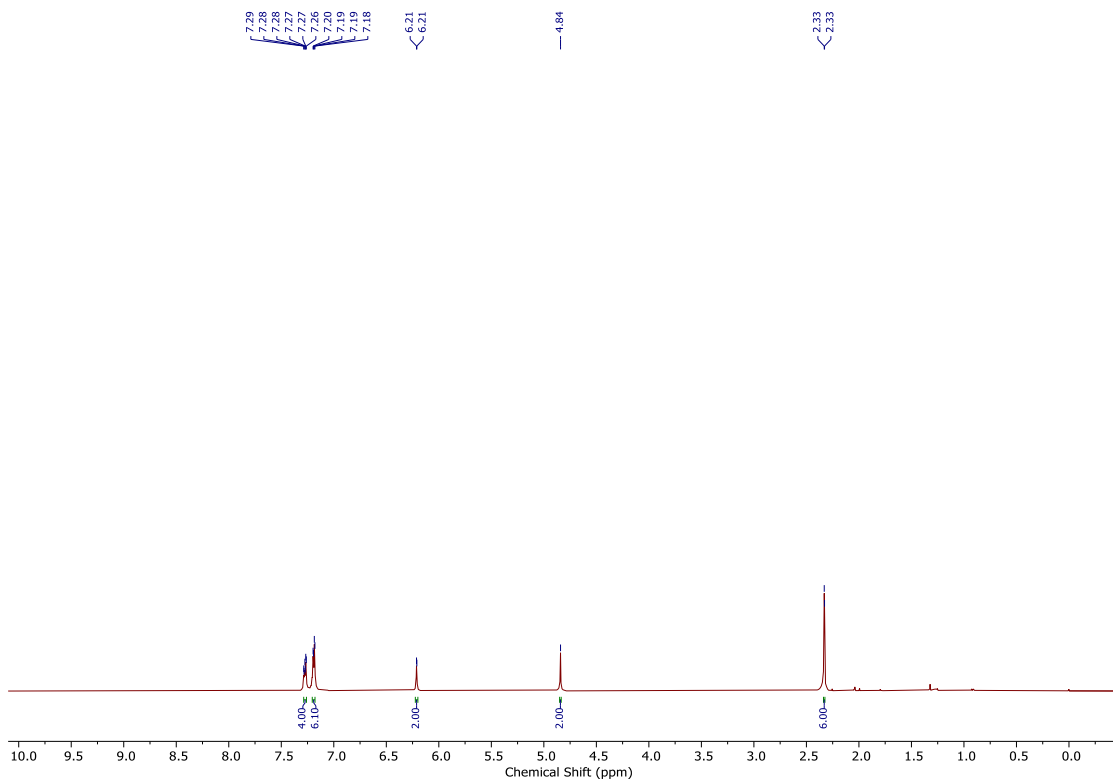

$^1\text{H}$  NMR Spectra of **4b** in  $\text{CDCl}_3$  at 400 MHz

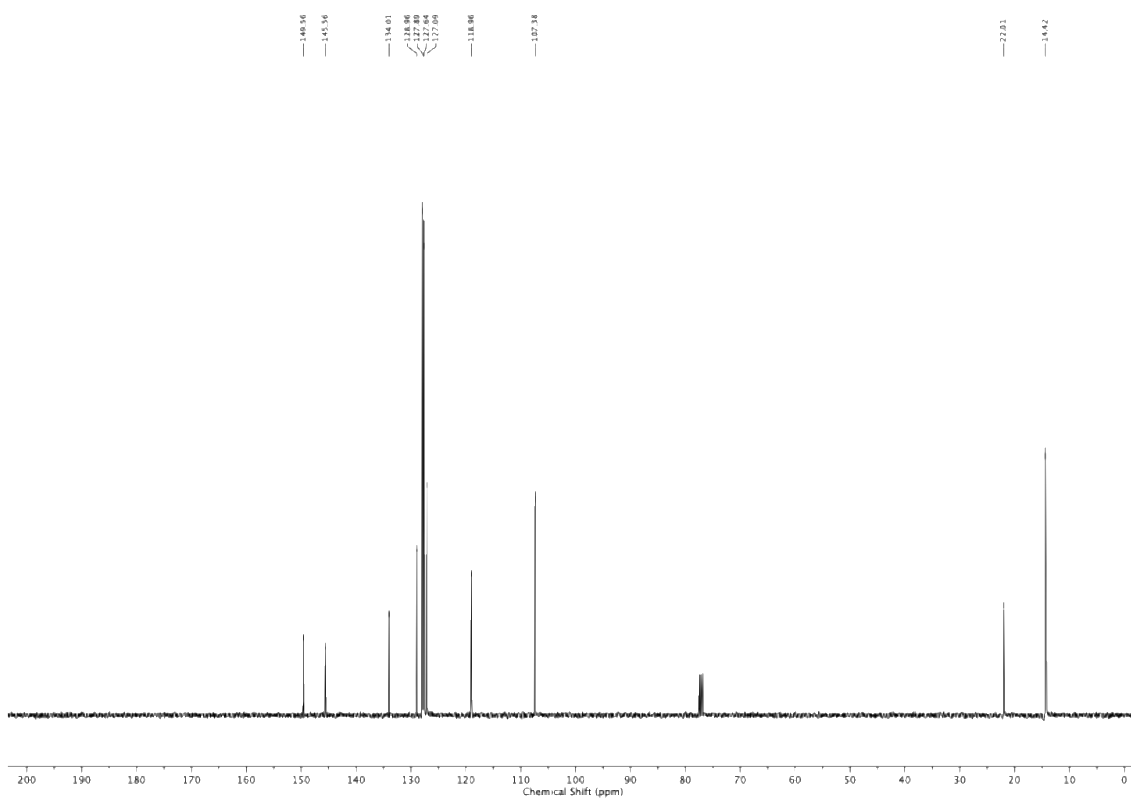

$^{13}\text{C}$  NMR Spectra of **4b** in  $\text{CDCl}_3$  at 100 MHz

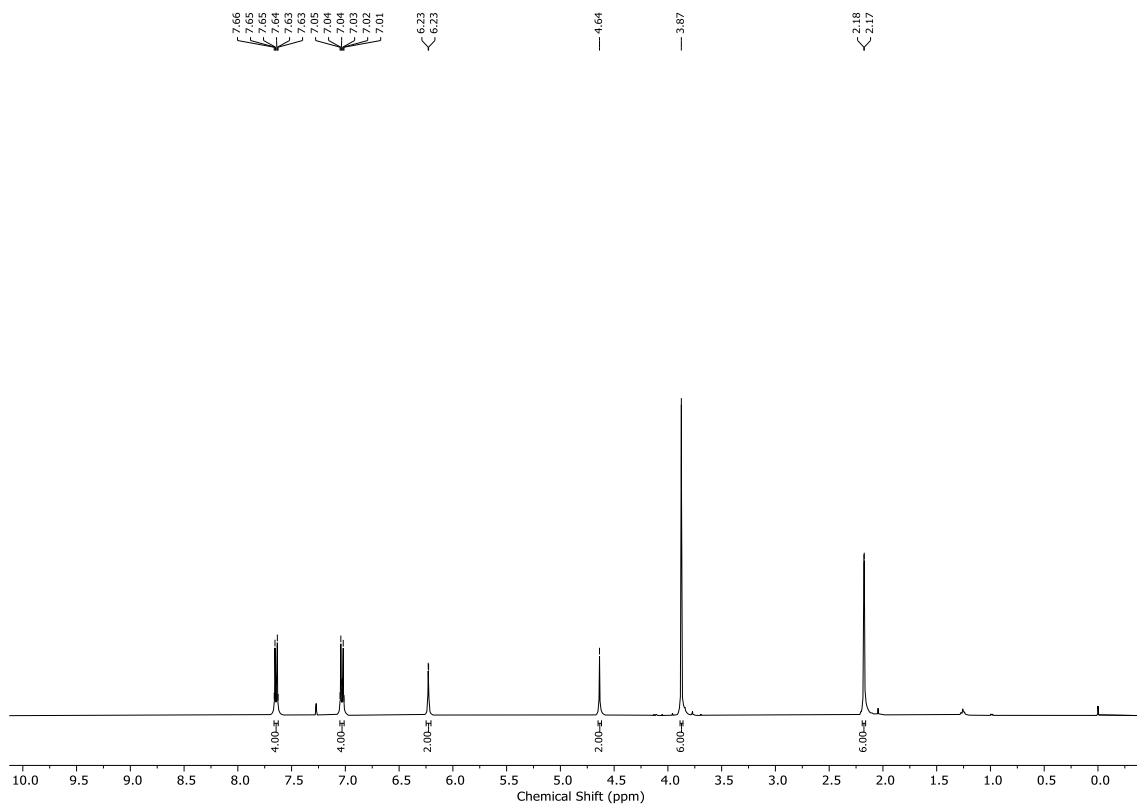

$^1\text{H}$  NMR Spectra of **4c** in  $\text{CDCl}_3$  at 400 MHz

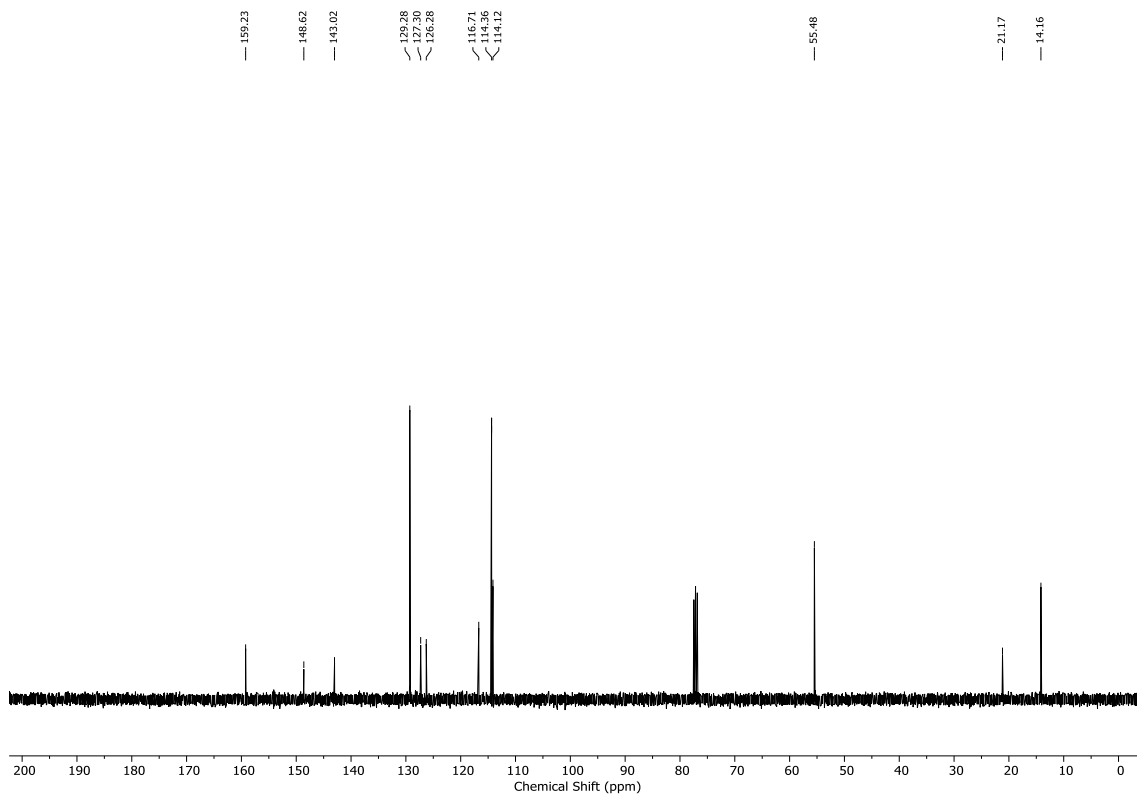

$^{13}\text{C}$  NMR Spectra of **4c** in  $\text{CDCl}_3$  at 100 MHz

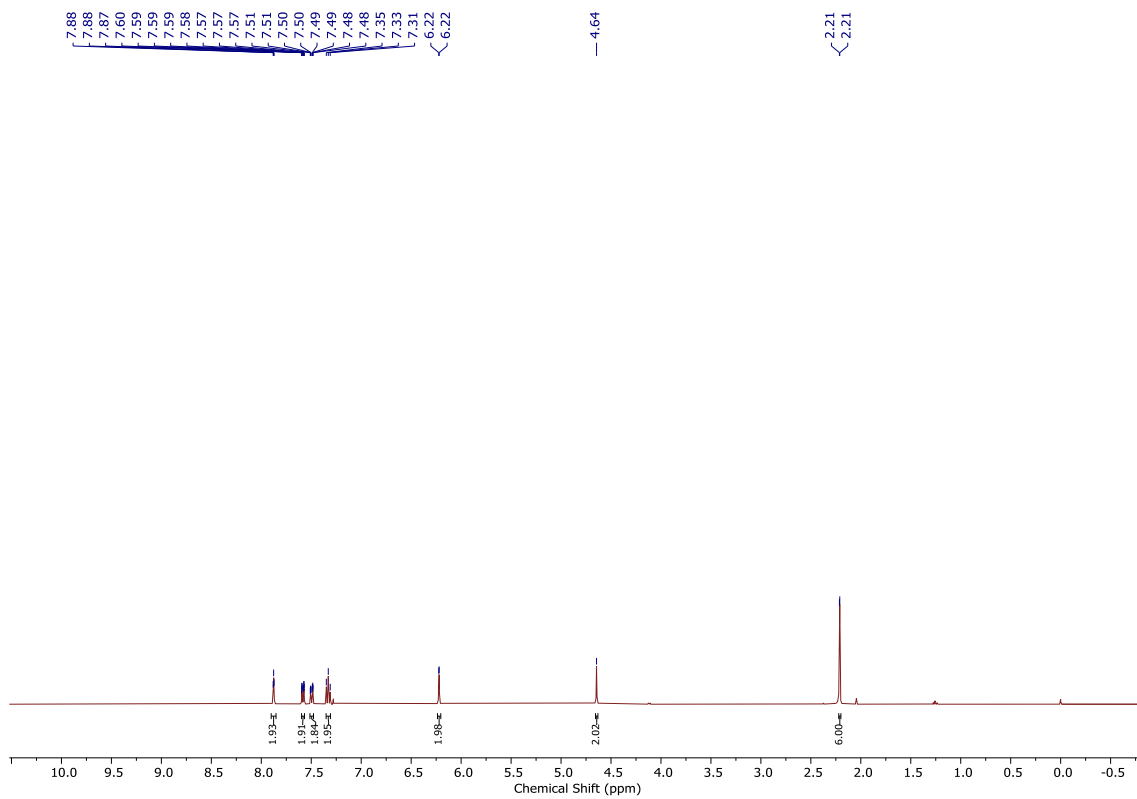

$^1\text{H}$  NMR Spectra of **4d** in  $\text{CDCl}_3$  at 400 MHz

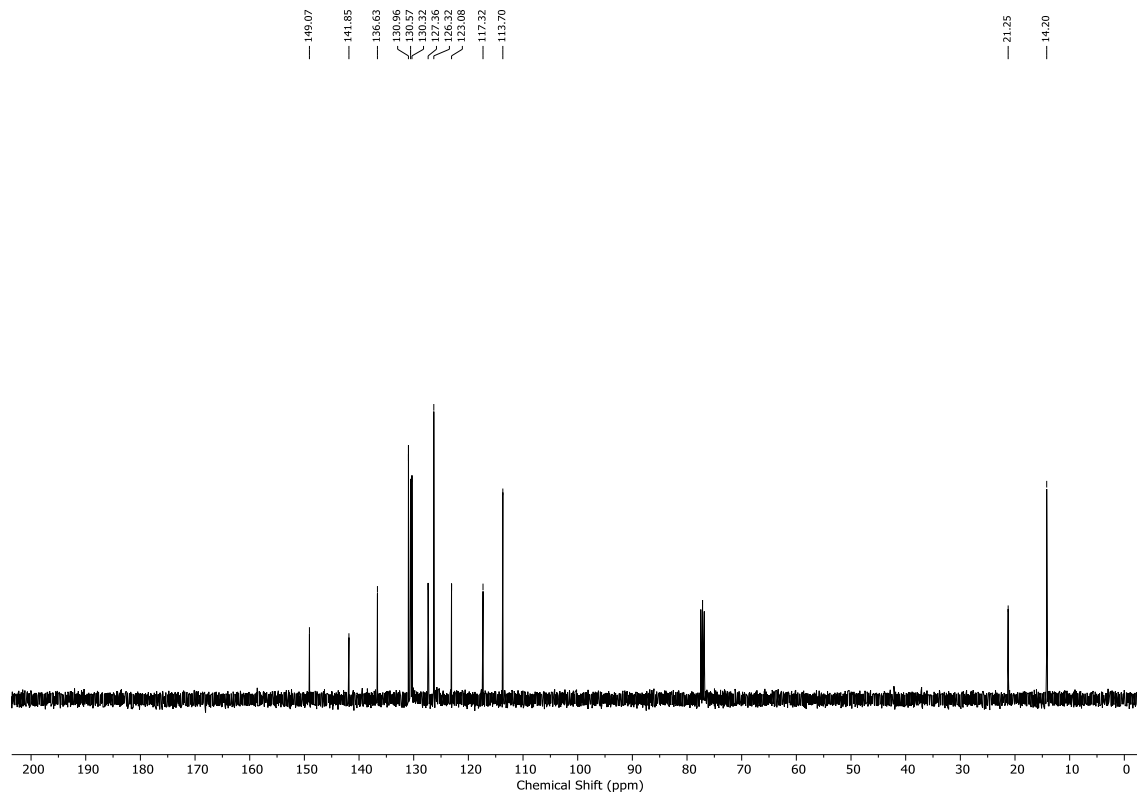

$^{13}\text{C}$  NMR Spectra of **4d** in  $\text{CDCl}_3$  at 100 MHz

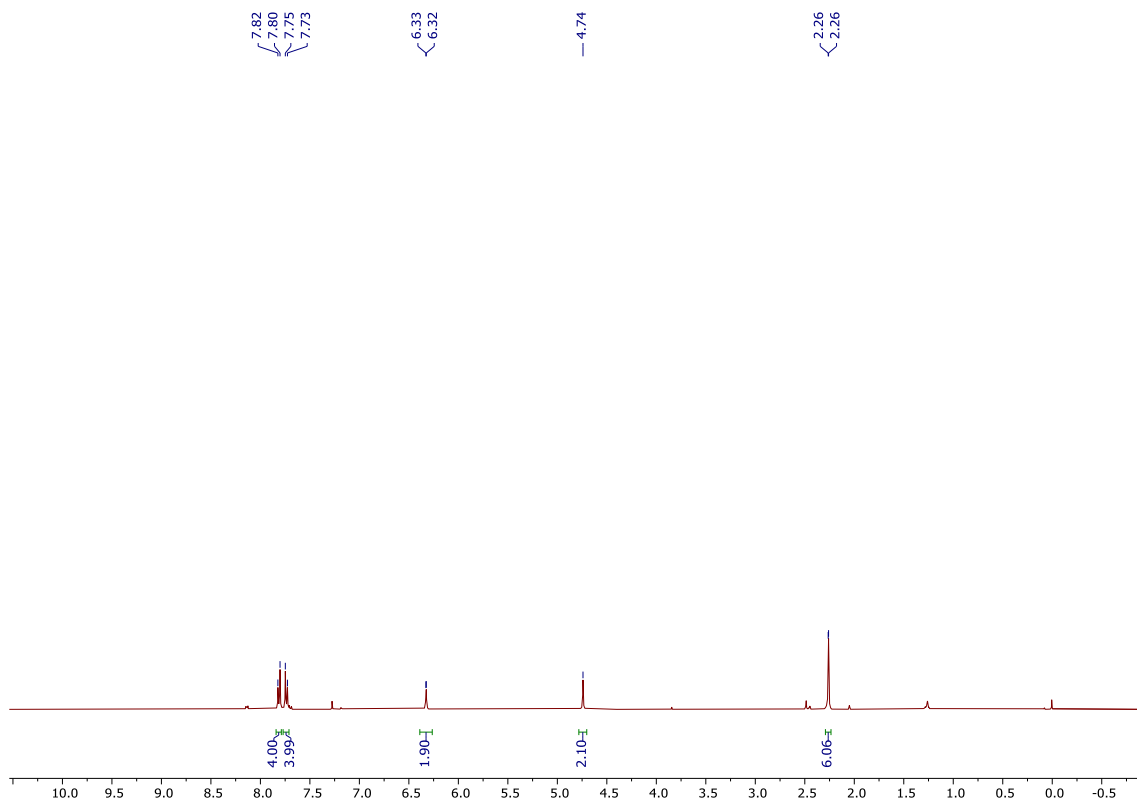

$^1\text{H}$  NMR Spectra of **4e** in  $\text{CDCl}_3$  at 400 MHz

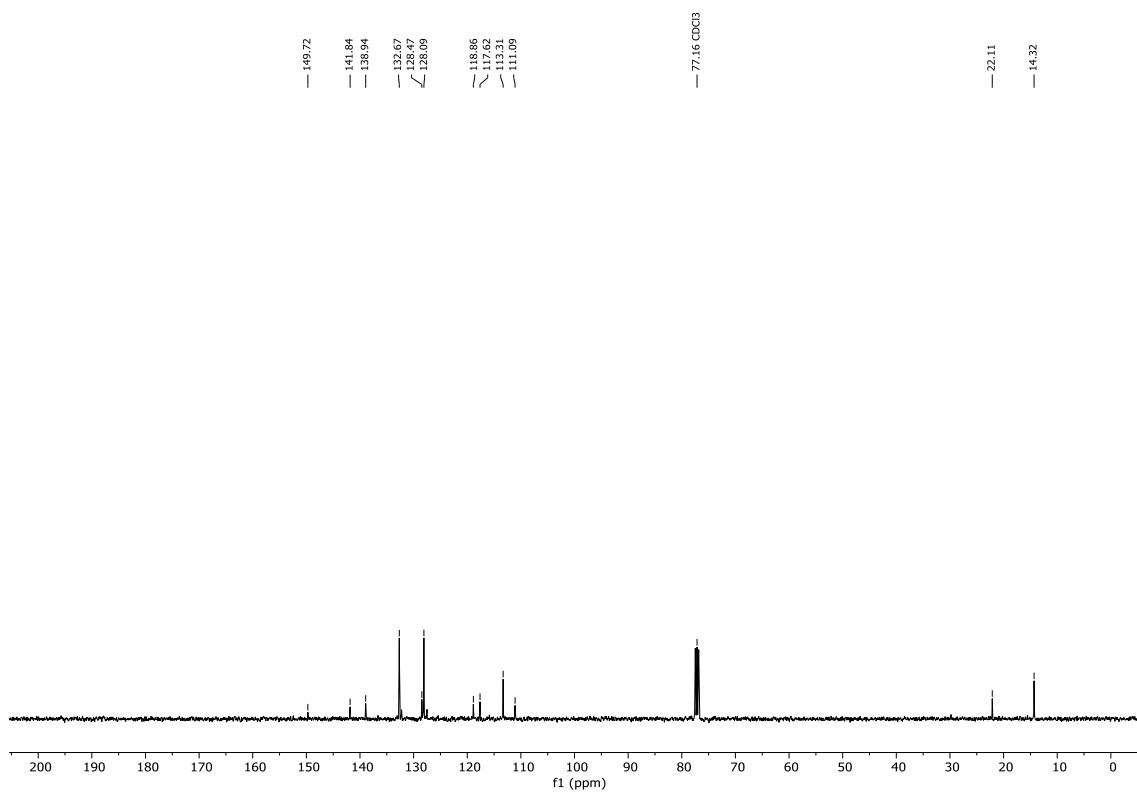

$^{13}\text{C}$  NMR Spectra of **4e** in  $\text{CDCl}_3$  at 100 MHz
